1 **Cyclophilin A regulates protein phase separation and mitigates**  
2 **haematopoietic stem cell aging**

3

4 Laure Maneix<sup>1,2,3,4,\*</sup>, Polina Iakova<sup>1,2,3,4,\*</sup>, Shannon E. Moree<sup>1,2,3,4</sup>, Jordon C.K. King<sup>1,2,4</sup>, David  
5 B. Sykes<sup>5</sup>, Cedric T. Hill<sup>5</sup>, Borja Saez<sup>6</sup>, Eric Spooner<sup>7</sup>, Daniela S. Krause<sup>8</sup>, Ergun Sahin<sup>1,9</sup>,  
6 Bradford C. Berk<sup>10</sup>, David T. Scadden<sup>5</sup>, André Catic<sup>1,2,3,4,†</sup>

7

8 <sup>1</sup>Huffington Center on Aging, Baylor College of Medicine, One Baylor Plaza, Houston, TX  
9 77030, USA.

10 <sup>2</sup>Stem Cells and Regenerative Medicine Center, Baylor College of Medicine, One Baylor Plaza,  
11 Houston, TX 77030, USA.

12 <sup>3</sup>Department of Molecular and Cellular Biology, Baylor College of Medicine, One Baylor Plaza,  
13 Houston, TX 77030, USA.

14 <sup>4</sup>Cell and Gene Therapy Program at the Dan L. Duncan Comprehensive Cancer Center, One  
15 Baylor Plaza, Houston, TX 77030, USA.

16 <sup>5</sup>Center for Regenerative Medicine, Massachusetts General Hospital, Harvard Medical School,  
17 185 Cambridge Street, Boston, MA 02114, USA.

18 <sup>6</sup>Center for Applied Medical Research, Hematology-Oncology Unit, Avenida Pío XII, 55, 31008  
19 Pamplona, Navarra, Spain.

20 <sup>7</sup>Whitehead Institute for Biomedical Research, 9 Cambridge Center, Cambridge, MA 02142,  
21 USA.

22 <sup>8</sup>Georg-Speyer-Haus, Institute for Tumor Biology and Experimental Therapy, Paul Ehrlich Str.  
23 42-44, Frankfurt am Main, D-60596, Germany.

1 <sup>9</sup>Department of Molecular Physiology and Biophysics, Baylor College of Medicine, One Baylor  
2 Plaza, Houston, TX 77030, USA.

3 <sup>10</sup>Department of Medicine, University of Rochester School of Medicine and Dentistry, 601  
4 Elmwood Avenue, Rochester, NY 14642, USA.

5

6 \* These authors contributed equally to this work.

7 † Corresponding author: André Catic.

8 E-mail address: [catic@bcm.edu](mailto:catic@bcm.edu)

9

## 1 **Abstract**

2

3 **Loss of protein quality is a driving force of aging<sup>1</sup>. The accumulation of misfolded**  
4 **proteins represents a vulnerability for long-lived cells, such as haematopoietic stem cells.**  
5 **How these cells, which have the ability to reconstitute all haematopoietic lineages**  
6 **throughout life<sup>2</sup>, maintain their regenerative potential and avert the effects of aging is**  
7 **poorly understood. Here, we determined the protein content in haematopoietic stem and**  
8 **progenitor cells to identify prevalent chaperones that support proteome integrity. We**  
9 **identified Peptidyl-Prolyl Isomerase A (PPIA or Cyclophilin A) as the dominant cytosolic**  
10 **foldase in this cell population. Loss of PPIA accelerated aging in the mouse stem cell**  
11 **compartment. In an effort to define targets of PPIA, we found that RNA- and DNA-binding**  
12 **proteins are common substrates of this chaperone. These proteins are enriched in**  
13 **intrinsically disordered regions (IDRs), which can catalyse protein condensation<sup>3</sup>.**  
14 **Isomerized target prolines are almost exclusively located within IDRs. We discovered that**  
15 **over 20% of PPIA client proteins are known to participate in liquid-liquid phase**  
16 **separation, enabling the formation of supramolecular membrane-less organelles. Using the**  
17 **poly-A binding protein PABPC1 as an example, we demonstrate that PPIA promotes phase**  
18 **separation of ribonucleoprotein particles, thereby increasing cellular stress resistance.**  
19 **Haematopoietic stem cell aging is associated with a decreased expression of PPIA and**  
20 **reduced synthesis of intrinsically disordered proteins. Our findings link the ubiquitously**  
21 **expressed chaperone PPIA to phase transition and identify macromolecular condensation**  
22 **as a potential determinant of the aging process in haematopoietic stem cells.**

23

## 1 Main Research Findings

2

3 Haematopoiesis is a dynamic regenerative process. Haematopoietic stem cells (HSCs)  
4 give rise to rapidly dividing progenitor cells that spawn hundreds of billions of progeny cells on  
5 a daily basis<sup>2</sup>. In contrast to progenitor cells, stem cells are long-lived, highly durable, and have a  
6 low mitotic index. Given their longevity and the absence of frequent cell division as a means of  
7 disposing of protein aggregates, protein homeostasis (proteostasis) is a critical component of  
8 HSC biology. Several studies have shown that proteostasis is tightly controlled in HSCs<sup>4-6</sup> and  
9 the capacity of cells to maintain proteostasis declines with age<sup>7</sup>. Ensuring protein homeostasis  
10 requires precise control of translation, protein folding, transport, and degradation. Supporting  
11 enzymes (chaperones) are key actors in this network, ensuring efficient folding of newly  
12 translated polypeptides and conformational maintenance of pre-existing proteins.

13 To identify the most prevalent chaperones in the haematopoietic compartment, we  
14 analysed the proteome of mouse haematopoietic stem and progenitor cells (HSPCs) through  
15 semi-quantitative 2-D gel electrophoresis and mass spectrometry (Fig. 1A and Extended Data  
16 Fig. 1). Of the discernible protein peaks, Cyclophilin A (PPIA) accounted for up to 14% of the  
17 cytosolic proteome, making it the most abundant foldase in HSPCs. PPIA was also the most  
18 highly expressed chaperone at the transcript level, accounting for over 0.5% of all mRNAs  
19 (Extended Data Fig. 2). Prolyl isomerases are conserved enzymes and cyclophilins represent one  
20 of the four classes with 17 members in humans<sup>8</sup> (Extended Data Fig. 3). Cyclophilins catalyse  
21 the isomerization of proline, the only proteinogenic amino acid that exists in abundance in both  
22 *trans*- and *cis*-configurations<sup>9</sup>. Previously described PPIA knockout (PPIA<sup>-/-</sup>) mice<sup>10</sup>  
23 demonstrated the gene is non-essential and animals showed no apparent phenotype under  
24 homeostatic conditions in the C57BL/6 background<sup>11</sup>.

1           To assess the role of PPIA in haematopoiesis, we compared knockout and heterozygous  
2 animals in a series of functional assays after bone marrow transplants. In these assays,  
3 heterozygous animals were indistinguishable from wild types (data not shown). For these studies,  
4 we competitively transplanted CD45.2<sup>+</sup> total nucleated bone marrow (BM) cells from PPIA<sup>-/-</sup> or  
5 PPIA<sup>+/-</sup> mice together with equal numbers of CD45.1<sup>+</sup> wild-type support BM cells into lethally  
6 irradiated CD45.1<sup>+</sup> recipient animals. Six months after transplantation, when the BM was fully  
7 repopulated by long-lived donor HSCs, we observed a statistically significant decrease of PPIA<sup>-/-</sup>  
8 B lymphocytes in the blood of recipient animals. In contrast, myeloid cells were increased in  
9 recipients of knockout cells (Fig. 1B). Changes in BM progenitor cells drove this myeloid  
10 skewing in the peripheral blood, as we observed an increase in common myeloid PPIA<sup>-/-</sup>  
11 progenitor cells at the expense of lymphoid progenitor cells (Fig. 1C). We also found higher  
12 relative and absolute numbers of HSPCs and myeloid-biased CD150<sup>high</sup> HSCs<sup>12</sup> in recipients of  
13 PPIA<sup>-/-</sup> BM (Fig. 1D).

14           To functionally define stem cell activity, we performed limiting dilution transplantation  
15 experiments with PPIA<sup>-/-</sup> and PPIA<sup>+/-</sup> BM cells. The results were comparable, indicating that  
16 higher numbers of immunophenotypic stem cells in the knockout BM did not correlate with  
17 increased stem cell activity (Extended Data Fig. 4). Next, we tested the self-renewing ability of  
18 HSCs by measuring the repopulation of BM following serial transplantations of PPIA<sup>-/-</sup> or  
19 PPIA<sup>+/-</sup> donor cells. Unlike wild-type or heterozygous BM cells, PPIA<sup>-/-</sup> cells failed to  
20 functionally engraft after the first round of transplantation and displayed exhaustion in long-term  
21 repopulation assays (Fig. 1E). Taken together, these functional transplant assays revealed cell-  
22 intrinsic defects leading to myeloid skewing, an immunophenotypic but not functional increase  
23 in stem cells, and impaired self-renewal with accelerated exhaustion in PPIA<sup>-/-</sup> HSCs. These

1 three characteristics are hallmarks of haematopoietic aging<sup>13-16</sup>, suggesting that the absence of  
2 PPIA resembles premature aging at the stem cell level.

3 PPIA is a highly and ubiquitously expressed prolyl isomerase that interacts with a wide  
4 range of proteins<sup>17,18</sup>. PPIA isomerizes proline residues of *de novo* synthesized proteins during  
5 translation. Several *in vitro* refolding studies demonstrated that cis/trans-isomerization of prolyl  
6 bonds can be a rate-limiting step during normal protein folding and translation<sup>19-22</sup>. To gain  
7 insight into the molecular changes caused by its depletion, we sought to determine the client  
8 proteins of PPIA. We accounted for non-specific interactions and distinguished PPIA-specific  
9 substrate proteins using a previously identified PPIA G104A mutant<sup>23</sup>, which has reduced  
10 activity. We tested several mutations and found that inactivation of the catalytic core yielded  
11 insoluble PPIA, while the G104A mutation, which moderately reduces substrate access to the  
12 catalytic core through an obstructive methyl group, allowed for normal expression levels and  
13 intracellular distribution (Extended Data Fig. 5). Therefore, proteins that interact with the wild-  
14 type PPIA but fail to bind to the PPIA G104A mutant are likely direct substrates of the foldase.  
15 Differential co-immunoprecipitation between the wild-type PPIA and the mutant PPIA revealed  
16 approximately 400 substrates of the wild-type enzyme (Fig. 2A, Extended Data Fig. 6, and SI-  
17 PPIA client proteins), including 39 transcriptional regulators (Extended Data Table 1). Since we  
18 performed the co-immunoprecipitation in the cytosolic cell fraction, these results suggest PPIA  
19 and substrates interact during translation and prior to nuclear translocation (Fig. 2A).

20 In addition to DNA-binding proteins, the most prevalent group of PPIA clients included  
21 RNA-associated proteins involved in ribosome assembly, translation, and splicing (Fig. 2A).  
22 Among structural features that were enriched in PPIA substrates, the most significant motif was  
23 the nucleotide-binding domain with an alpha-beta plait structure. Proteins containing these  
24 domains also feature high levels of intrinsically disordered regions (IDRs), *i.e.* unstructured

1 protein regions displaying a sequence-driven preference for conformational heterogeneity<sup>24</sup> (Fig.  
2 2B).

3 Prolyl isomerases such as PPIA catalyse the reversible *trans*- and *cis*-conversions of  
4 peptide bonds at proline residues. While *cis*-prolines represent about 10% of the total proline  
5 pool, they are disproportionally enriched within IDRs (Fig. 2C), based on an analysis of over  
6 15,000 proline residues within the Protein Data Bank<sup>25</sup>. Thus, these findings indicate that PPIA  
7 and related enzymes predominantly isomerize prolines within unstructured protein regions.

8 In line with PPIA's proposed activity as a co-translational chaperone<sup>26</sup> and given that  
9 proline isomerization is slow and often rate-limiting during translation, we expected PPIA  
10 expression to directly affect *de novo* protein translation of its substrates. We determined the *de*  
11 *novo* synthesis of proteins using pulsed SILAC in HeLa and 293T cells with either normal or  
12 reduced levels of PPIA (Extended Data Fig. 7 & Extended Data Fig. 8). We found that loss of  
13 PPIA significantly reduced translation, specifically of PPIA clients, in both cell types (Fig. 2D  
14 and SI-Pulsed SILAC). Overall, *de novo* translation rates of PPIA target proteins were lower than  
15 for other proteins and further reduced when PPIA was depleted (Fig. 2E). These results  
16 demonstrate that PPIA supports *de novo* translation of its target proteins and are consistent with  
17 earlier reports that IDR-rich proteins have a low translation rate, *i.e.* synthesis of disordered  
18 proteins appears to be at a disadvantage<sup>27,28</sup> (Extended Data Fig. 9).

19 Within PPIA substrate proteins, the dominant ontologies we found were translation and  
20 mRNA splicing, and we discovered that more than 20% of PPIA clients are known to engage in  
21 protein phase separation (reviewed in<sup>29-33</sup>) (Extended Data Table 2). Liquid-liquid phase  
22 separation allows the intracellular compartmentalization of ribonucleoprotein assemblies through  
23 changes in solubility and subsequent formation of membrane-less organelles<sup>34</sup>. Prominent  
24 examples of phase-separating proteins that bind to wild-type but not mutant PPIA include the

1 splicing factor TDP43 (TARDBP), the nucleolus organizing transcription factor UBTF, the stress  
2 granule initiator G3BP1, DEAD-box helicases, YBX1, and the mRNA regulator Poly(A)  
3 Binding Protein Cytoplasmic 1 (PABPC1). Recently, the notion has emerged that intrinsically  
4 disordered polypeptides can be molecular determinants of phase separation and modulate the  
5 formation of membrane-less organelles<sup>35-37</sup>. For instance, the RNA binding protein PABPC1 has  
6 been shown to engage in phase separation through its unstructured proline-rich linker region,  
7 which is instrumental to the formation of RNA stress granules<sup>38</sup>. Following PPIA knockdown, *de*  
8 *novo* synthesis of PABPC1 protein was reduced by 20-30%, suggesting the foldase engages with  
9 PABPC1 during translation (Fig. 3A). We biochemically confirmed that PABPC1 is a client of  
10 PPIA (Fig. 3B; Extended Data Fig. 6 and Extended Data Fig. 10) and that PABPC1 protein  
11 expression is reduced following PPIA inhibition by cyclosporine A (Extended Data Fig. 11). In  
12 contrast, PPIA inhibition did not reduce the transcription of the gene encoding PABPC1  
13 (Extended Data Fig. 11). These findings support the notion that PPIA regulates PABPC1 folding  
14 by controlling proline isomerization during translation.

15 In response to diverse stresses or unfavourable growth conditions, PABPC1 undergoes  
16 phase transition and participates in stress granule formation to sequester cytoplasmic RNA and  
17 ribosomes (SI-Video 1). This allows cells to temporarily reduce protein translation<sup>39,40</sup>. Treating  
18 cells with the oxidative stressor sodium arsenite is a well-established experimental approach to  
19 study formation of stress granules. To determine whether proline isomerization affects phase  
20 separation of PABPC1, we genetically modulated PPIA activity and assessed the dynamics of  
21 stress granule formation. Upon stress induction with sodium arsenite, we observed significantly  
22 reduced stress granule formation in the absence of prolyl isomerase activity (Fig. 3C) (SI-Videos  
23 2 and 3). Cells devoid of PPIA were more susceptible to cell death following oxidative stress



1 (Fig. 3C). In addition, re-introduction of the foldase partially rescued stress granule formation in  
2 PPIA knockdown cells (Fig. 3C).

3 Our data suggest that PPIA is involved in PABPC1 folding during translation and that the  
4 foldase plays a critical role in phase transition of this protein. Given the number of key regulators  
5 of phase separation among PPIA clients, our findings indicate that proline isomerization may be  
6 a major determinant for the formation of membrane-less organelles. Supporting this hypothesis,  
7 PPIA has been shown to co-localize with stress granules<sup>41</sup>. In addition, proline residues are key  
8 residues during phase transition of prion-like and unstructured proteins, and can regulate protein  
9 solubility and amyloid formation in an isomer-specific fashion<sup>34,42-45</sup>.

10 We next addressed whether our findings that PPIA regulates the function of intrinsically  
11 disordered polypeptides, and thereby protein phase separation, relate to the haematopoietic  
12 phenotype resembling aging that we observed in PPIA<sup>-/-</sup> mice. A previous quantitative proteomic  
13 analysis of human dermal fibroblasts from subjects of different ages showed that PPIA is  
14 significantly reduced with age, but its role in haematopoietic aging remained unknown<sup>46</sup>. In the  
15 haematopoietic compartment, we found a substantial reduction of PPIA protein in HSCs from  
16 old mice compared to younger cells (Fig. 4A). Of note, PPIA transcripts were not altered in  
17 HSPCs of different ages in our RNA-seq data. Based on our earlier findings, we would expect  
18 reduced PPIA activity to result in lower expression of IDR-rich proteins. Indeed, the comparative  
19 analysis of the proteome of young and old mice showed a reduction of IDR-rich proteins in  
20 HSPCs during aging, which is not reflected at the transcriptome level (Fig. 4B). These results  
21 suggest that synthesis of IDR-rich proteins, which are challenging to translate, is reduced in older  
22 HSCs and progenitor cells, and may therefore affect protein phase separation and stress  
23 responses in these cells.

1           We next explored whether our findings in the mouse haematopoietic system also applied  
2 to human blood. A comprehensive study of the HSPC transcriptome and proteome in humans of  
3 different ages<sup>47</sup> confirms our results and shows highly significant reduction in the expression of  
4 intrinsically disordered proteins in aged individuals that is not manifest in the transcriptome (Fig.  
5 4B). Given the disconnect we observed between protein and gene expression, we speculate that  
6 translation efficiency may be partially responsible for the differences in lineage commitment  
7 between young and old haematopoiesis, namely the shift towards myelopoiesis at the expense of  
8 lymphopoiesis during aging. Intrinsically disordered proteins are less efficiently translated, in  
9 part due to their dependence on foldases such as PPIA. At the same time, these proteins are  
10 under positive selection during the course of evolution and complex organisms contain more  
11 disordered regions in their proteomes<sup>48,49</sup>. We hypothesized that this phylogenetic feature makes  
12 IDR-rich proteins more prevalent in evolutionarily newer lymphoid cells compared to older  
13 myeloid cells. Indeed, the proteome of human granulocytes showed significantly fewer  
14 disordered regions compared to lymphocytes (Fig. 4C). As a consequence, the proteome of  
15 granulocytes is likely more efficiently synthesized, which may partially explain the preferred  
16 generation of these cells over lymphocytes with age or under stress. We therefore propose that  
17 the expression of IDR-rich proteins constitutes a translational bottleneck during aging or under  
18 stress conditions.

19           In conclusion, we discovered that Cyclophilin A (PPIA) is the most highly expressed  
20 chaperone in haematopoietic stem and progenitor cells. PPIA engages with its substrate proteins  
21 during translation and our data suggests that it does so largely through *cis*-isomerization of  
22 prolines within intrinsically disordered regions. A substantial fraction of PPIA targets engage in  
23 phase separation and we found evidence for impaired protein condensation in the absence of the  
24 foldase. PPIA levels are reduced in aged haematopoietic stem cells, altering the proteome and

1 thereby decreasing stress resistance, reducing the long-term fitness of these cells, and biasing  
2 their lineage commitment. Altogether, our results identify PPIA as a major component in the  
3 chain of molecular events during haematopoietic aging that affects the expression of disordered  
4 proteins and the formation of membrane-less organelles (Fig. 5).

5

## 1 **References**

2

3 1 Hipp, M. S., Kasturi, P. & Hartl, F. U. The proteostasis network and its decline in ageing.  
4 *Nature reviews. Molecular cell biology* **20**, 421-435, doi:10.1038/s41580-019-0101-y  
5 (2019).

6 2 Sun, J. *et al.* Clonal dynamics of native haematopoiesis. *Nature* **514**, 322-327,  
7 doi:10.1038/nature13824 (2014).

8 3 Kato, M. *et al.* Cell-free formation of RNA granules: low complexity sequence domains  
9 form dynamic fibers within hydrogels. *Cell* **149**, 753-767, doi:10.1016/j.cell.2012.04.017  
10 (2012).

11 4 Signer, R. A., Magee, J. A., Salic, A. & Morrison, S. J. Haematopoietic stem cells require  
12 a highly regulated protein synthesis rate. *Nature* **509**, 49-54, doi:10.1038/nature13035  
13 (2014).

14 5 Hidalgo San Jose, L. *et al.* Modest Declines in Proteome Quality Impair Hematopoietic  
15 Stem Cell Self-Renewal. *Cell reports* **30**, 69-80.e66, doi:10.1016/j.celrep.2019.12.003  
16 (2020).

17 6 Mohrin, M. *et al.* Stem cell aging. A mitochondrial UPR-mediated metabolic checkpoint  
18 regulates hematopoietic stem cell aging. *Science (New York, N.Y.)* **347**, 1374-1377,  
19 doi:10.1126/science.aaa2361 (2015).

20 7 Lopez-Otin, C., Blasco, M. A., Partridge, L., Serrano, M. & Kroemer, G. The hallmarks  
21 of aging. *Cell* **153**, 1194-1217, doi:10.1016/j.cell.2013.05.039 (2013).

22 8 Davis, T. L. *et al.* Structural and biochemical characterization of the human cyclophilin  
23 family of peptidyl-prolyl isomerases. *PLoS biology* **8**, e1000439,  
24 doi:10.1371/journal.pbio.1000439 (2010).

- 1 9 Schmidpeter, P. A., Koch, J. R. & Schmid, F. X. Control of protein function by prolyl  
2 isomerization. *Biochimica et biophysica acta* **1850**, 1973-1982,  
3 doi:10.1016/j.bbagen.2014.12.019 (2015).
- 4 10 Colgan, J. *et al.* Cyclophilin A regulates TCR signal strength in CD4+ T cells via a  
5 proline-directed conformational switch in Itk. *Immunity* **21**, 189-201,  
6 doi:10.1016/j.immuni.2004.07.005 (2004).
- 7 11 Satoh, K. *et al.* Cyclophilin A mediates vascular remodeling by promoting inflammation  
8 and vascular smooth muscle cell proliferation. *Circulation* **117**, 3088-3098,  
9 doi:10.1161/circulationaha.107.756106 (2008).
- 10 12 Beerman, I. *et al.* Functionally distinct hematopoietic stem cells modulate hematopoietic  
11 lineage potential during aging by a mechanism of clonal expansion. *Proc Natl Acad Sci U*  
12 *S A* **107**, 5465-5470, doi:10.1073/pnas.1000834107 (2010).
- 13 13 Rossi, D. J., Jamieson, C. H. & Weissman, I. L. Stems cells and the pathways to aging  
14 and cancer. *Cell* **132**, 681-696, doi:10.1016/j.cell.2008.01.036 (2008).
- 15 14 Oh, J., Lee, Y. D. & Wagers, A. J. Stem cell aging: mechanisms, regulators and  
16 therapeutic opportunities. *Nature medicine* **20**, 870-880, doi:10.1038/nm.3651 (2014).
- 17 15 Goodell, M. A. & Rando, T. A. Stem cells and healthy aging. *Science (New York, N.Y.)*  
18 **350**, 1199-1204, doi:10.1126/science.aab3388 (2015).
- 19 16 Geiger, H., de Haan, G. & Florian, M. C. The ageing haematopoietic stem cell  
20 compartment. *Nature reviews. Immunology* **13**, 376-389, doi:10.1038/nri3433 (2013).
- 21 17 Wang, P. & Heitman, J. The cyclophilins. *Genome biology* **6**, 226, doi:10.1186/gb-2005-  
22 6-7-226 (2005).
- 23 18 Nigro, P., Pompilio, G. & Capogrossi, M. C. Cyclophilin A: a key player for human  
24 disease. *Cell death & disease* **4**, e888, doi:10.1038/cddis.2013.410 (2013).

- 1 19 Lang, K., Schmid, F. X. & Fischer, G. Catalysis of protein folding by prolyl isomerase.  
2 *Nature* **329**, 268-270, doi:10.1038/329268a0 (1987).
- 3 20 Kiefhaber, T., Quaas, R., Hahn, U. & Schmid, F. X. Folding of ribonuclease T1. 2.  
4 Kinetic models for the folding and unfolding reactions. *Biochemistry* **29**, 3061-3070,  
5 doi:10.1021/bi00464a024 (1990).
- 6 21 Wedemeyer, W. J., Welker, E. & Scheraga, H. A. Proline cis-trans isomerization and  
7 protein folding. *Biochemistry* **41**, 14637-14644, doi:10.1021/bi020574b (2002).
- 8 22 Jakob, R. P., Zoldák, G., Aumüller, T. & Schmid, F. X. Chaperone domains convert  
9 prolyl isomerases into generic catalysts of protein folding. *Proc Natl Acad Sci U S A* **106**,  
10 20282-20287, doi:10.1073/pnas.0909544106 (2009).
- 11 23 Cardenas, M. E., Lim, E. & Heitman, J. Mutations that perturb cyclophilin A ligand  
12 binding pocket confer cyclosporin A resistance in *Saccharomyces cerevisiae*. *J Biol*  
13 *Chem* **270**, 20997-21002 (1995).
- 14 24 Boeynaems, S. *et al.* Protein Phase Separation: A New Phase in Cell Biology. *Trends in*  
15 *cell biology* **28**, 420-435, doi:10.1016/j.tcb.2018.02.004 (2018).
- 16 25 Pahlke, D., Freund, C., Leitner, D. & Labudde, D. Statistically significant dependence of  
17 the Xaa-Pro peptide bond conformation on secondary structure and amino acid sequence.  
18 *BMC structural biology* **5**, 8, doi:10.1186/1472-6807-5-8 (2005).
- 19 26 Brehme, M. *et al.* A chaperome subnetwork safeguards proteostasis in aging and  
20 neurodegenerative disease. *Cell reports* **9**, 1135-1150, doi:10.1016/j.celrep.2014.09.042  
21 (2014).
- 22 27 Schwanhauser, B. *et al.* Global quantification of mammalian gene expression control.  
23 *Nature* **473**, 337-342, doi:10.1038/nature10098 (2011).

- 1 28 Pentony, M. M. & Jones, D. T. Modularity of intrinsic disorder in the human proteome.  
2 *Proteins* **78**, 212-221, doi:10.1002/prot.22504 (2010).
- 3 29 Jain, S. & Parker, R. The discovery and analysis of P Bodies. *Advances in experimental*  
4 *medicine and biology* **768**, 23-43, doi:10.1007/978-1-4614-5107-5\_3 (2013).
- 5 30 Anderson, P., Kedersha, N. & Ivanov, P. Stress granules, P-bodies and cancer.  
6 *Biochimica et biophysica acta* **1849**, 861-870, doi:10.1016/j.bbagr.2014.11.009 (2015).
- 7 31 Hondele, M. *et al.* DEAD-box ATPases are global regulators of phase-separated  
8 organelles. *Nature* **573**, 144-148, doi:10.1038/s41586-019-1502-y (2019).
- 9 32 Markmiller, S. *et al.* Context-Dependent and Disease-Specific Diversity in Protein  
10 Interactions within Stress Granules. *Cell* **172**, 590-604.e513,  
11 doi:10.1016/j.cell.2017.12.032 (2018).
- 12 33 Lallemand-Breitenbach, V. & de Thé, H. PML nuclear bodies: from architecture to  
13 function. *Current opinion in cell biology* **52**, 154-161, doi:10.1016/j.ceb.2018.03.011  
14 (2018).
- 15 34 Gomes, E. & Shorter, J. The molecular language of membraneless organelles. *J Biol*  
16 *Chem* **294**, 7115-7127, doi:10.1074/jbc.TM118.001192 (2019).
- 17 35 Nott, T. J. *et al.* Phase transition of a disordered nuage protein generates environmentally  
18 responsive membraneless organelles. *Molecular cell* **57**, 936-947,  
19 doi:10.1016/j.molcel.2015.01.013 (2015).
- 20 36 Sanders, D. W. *et al.* Competing Protein-RNA Interaction Networks Control Multiphase  
21 Intracellular Organization. *Cell* **181**, 306-324.e328, doi:10.1016/j.cell.2020.03.050  
22 (2020).

- 1 37 Alberti, S., Gladfelter, A. & Mittag, T. Considerations and Challenges in Studying  
2 Liquid-Liquid Phase Separation and Biomolecular Condensates. *Cell* **176**, 419-434,  
3 doi:10.1016/j.cell.2018.12.035 (2019).
- 4 38 Riback, J. A. *et al.* Stress-Triggered Phase Separation Is an Adaptive, Evolutionarily  
5 Tuned Response. *Cell* **168**, 1028-1040.e1019, doi:10.1016/j.cell.2017.02.027 (2017).
- 6 39 Vanderweyde, T., Youmans, K., Liu-Yesucevitz, L. & Wolozin, B. Role of stress  
7 granules and RNA-binding proteins in neurodegeneration: a mini-review. *Gerontology*  
8 **59**, 524-533, doi:10.1159/000354170 (2013).
- 9 40 Kornmann, B. & Weis, K. Liquid but not contactless. *Science (New York, N.Y.)* **367**, 507-  
10 508, doi:10.1126/science.aba3771 (2020).
- 11 41 Xiang, S. *et al.* The LC Domain of hnRNPA2 Adopts Similar Conformations in Hydrogel  
12 Polymers, Liquid-like Droplets, and Nuclei. *Cell* **163**, 829-839,  
13 doi:10.1016/j.cell.2015.10.040 (2015).
- 14 42 Ciferri, A. & Orofino, T. A. Phase Separation of Poly-L-proline in Salt Solutions. *The*  
15 *Journal of Physical Chemistry* **70**, 3277-3285, doi:10.1021/j100882a042 (1966).
- 16 43 Jahn, T. R., Parker, M. J., Homans, S. W. & Radford, S. E. Amyloid formation under  
17 physiological conditions proceeds via a native-like folding intermediate. *Nature*  
18 *structural & molecular biology* **13**, 195-201, doi:10.1038/nsmb1058 (2006).
- 19 44 Wolozin, B. & Ivanov, P. Stress granules and neurodegeneration. *Nature reviews.*  
20 *Neuroscience* **20**, 649-666, doi:10.1038/s41583-019-0222-5 (2019).
- 21 45 Nakamura, K. *et al.* Proline isomer-specific antibodies reveal the early pathogenic tau  
22 conformation in Alzheimer's disease. *Cell* **149**, 232-244, doi:10.1016/j.cell.2012.02.016  
23 (2012).



- 1 46 Boraldi, F. *et al.* Proteome analysis of dermal fibroblasts cultured in vitro from human  
2 healthy subjects of different ages. *Proteomics* **3**, 917-929, doi:10.1002/pmic.200300386  
3 (2003).
- 4 47 Hennrich, M. L. *et al.* Cell-specific proteome analyses of human bone marrow reveal  
5 molecular features of age-dependent functional decline. *Nature communications* **9**, 4004,  
6 doi:10.1038/s41467-018-06353-4 (2018).
- 7 48 Ward, J. J., Sodhi, J. S., McGuffin, L. J., Buxton, B. F. & Jones, D. T. Prediction and  
8 functional analysis of native disorder in proteins from the three kingdoms of life. *Journal*  
9 *of molecular biology* **337**, 635-645, doi:10.1016/j.jmb.2004.02.002 (2004).
- 10 49 Afanasyeva, A., Bockwoldt, M., Cooney, C. R., Heiland, I. & Gossmann, T. I. Human  
11 long intrinsically disordered protein regions are frequent targets of positive selection.  
12 *Genome research* **28**, 975-982, doi:10.1101/gr.232645.117 (2018).

## 1 **Figure legends**

### 2 **Figure 1: PPIA deficiency induces an aging-like haematopoietic phenotype.**

3 **A**, Left panel: Haematopoietic stem and progenitor cell (HSPC) lysate was labelled with amine-  
4 reactive dye and separated on a 2-D electrophoresis gel. Right panel: Quantitative intensity  
5 representation of the mouse HSPC proteome. Dashed white lines indicate PPIA as determined by  
6 MS/MS. Two independent experiments were performed.

7 **B**, Six months after bone marrow (BM) transplantation, blood cell analysis with flow cytometry  
8 reveals that PPIA knockout (PPIA<sup>-/-</sup>) BM donor cells give rise to less lymphoid (B220) and more  
9 myeloid (Mac1) cells in the peripheral blood (PB).

10 **C**, Seven months after transplantation, BM cell analysis with flow cytometry shows that mice  
11 transplanted with PPIA<sup>-/-</sup> BM donor cells have increased common myeloid progenitors (CMP)  
12 and decreased common lymphoid progenitors (CLP).

13 **D**, PPIA-deficient donor cells show increased HSPCs (LKS; lineage<sup>-</sup>/c-Kit<sup>+</sup>/Sca1<sup>+</sup> cells) and  
14 CD150<sup>high</sup> (lineage<sup>-</sup>/c-Kit<sup>+</sup>/Sca1<sup>+</sup>/CD34<sup>-</sup>/CD135<sup>-</sup>/CD150<sup>high</sup>) haematopoietic stem cells (HSCs).

15 **E**, Cell analysis shows that PPIA<sup>-/-</sup> donor-derived progenitor cells exhaust in serial  
16 transplantations. Shown is the proportion of donor-derived (CD45.2<sup>+</sup>) cells among all PB cells 2,  
17 4, and 12 months after the first transplantation. For B, C, D, and E, data are mean ± SD; NS, non-  
18 significant, \* p < 0.05, \*\* p < 0.01, and \*\*\* p < 0.001 by unpaired Student's two-tailed *t*-test. Data  
19 are representative of two independent biological replicates.

Figure 1

A

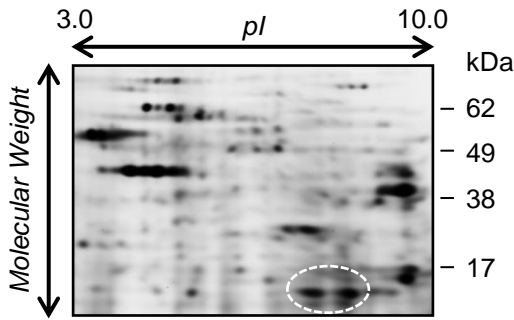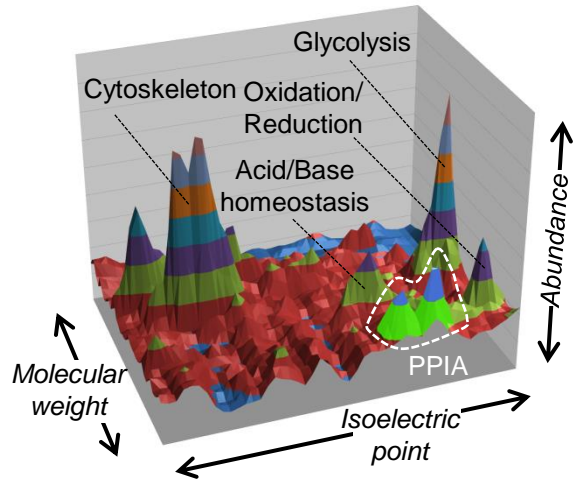

B

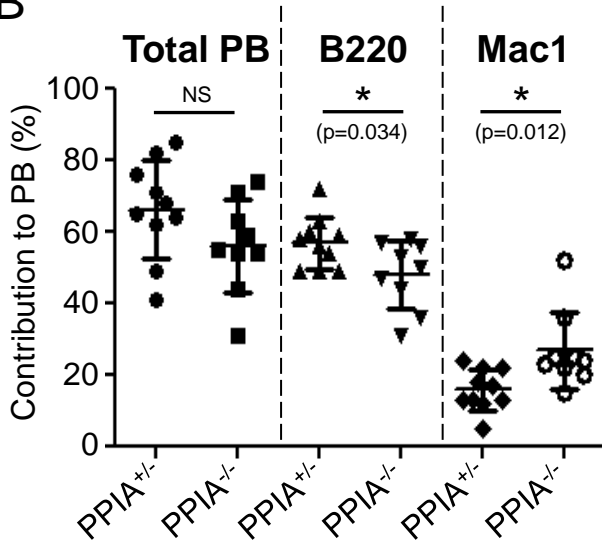

C

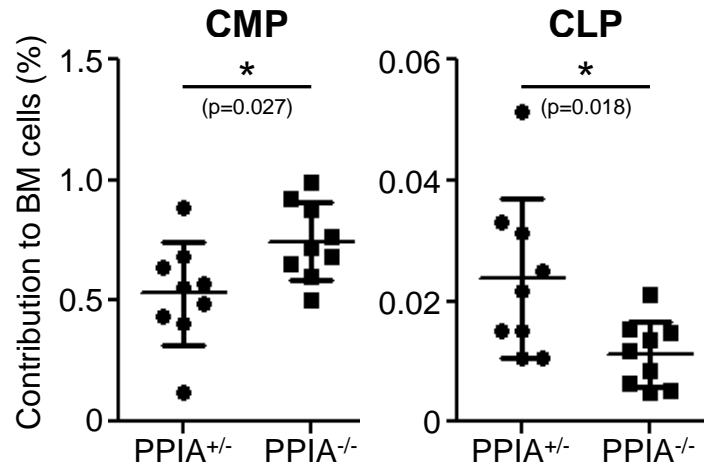

D

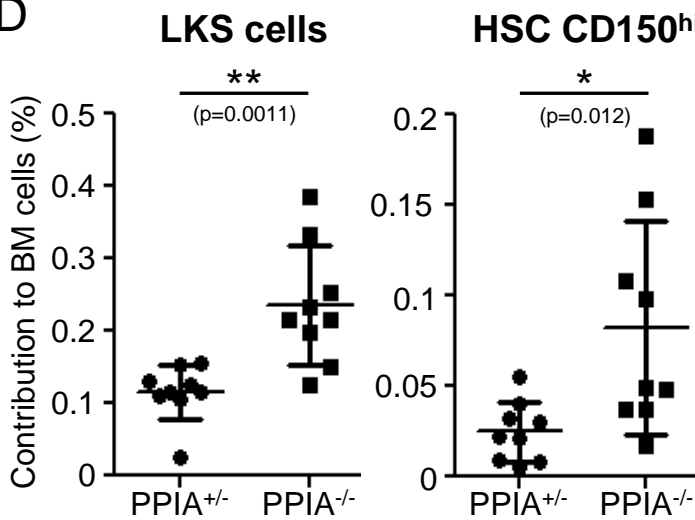

E

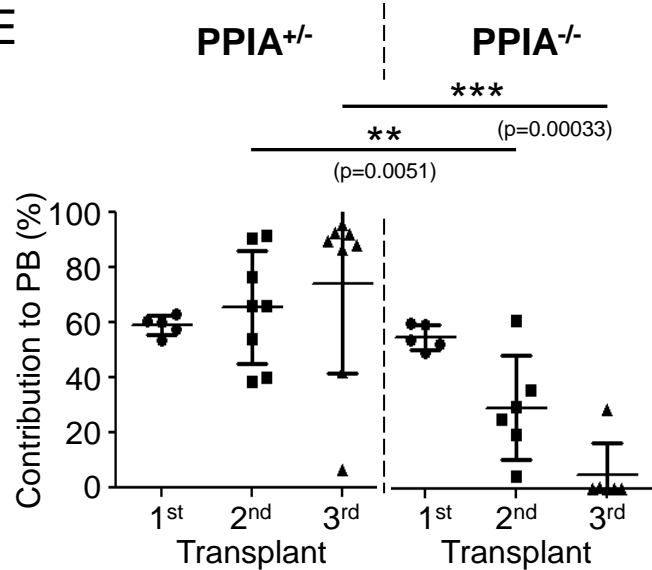

1 **Figure 2: PPIA activity promotes translation of proteins enriched for Intrinsically**  
2 **Disordered Regions (IDRs).**

3 **A**, Left panel: Immunoprecipitation (IP) and SYPRO Ruby gel stain of triple FLAG-tagged wild-  
4 type (3XF-WT PPIA) and G104A point-mutant PPIA (3XF-Mutant PPIA) were performed in  
5 order to identify PPIA interacting proteins. Grey arrow indicates positive enrichment for PPIA  
6 protein in the pull-down fractions. Middle panel: Purity of the cell lysates was verified by the  
7 detection of histone H3 protein expression in subcellular fractions. 3-D pie chart: Gene ontology  
8 enrichment analysis of 3XF-WT PPIA versus 3XF-Mutant PPIA IP-mass spectrometry results.  
9 Data represent 385 consistently identified proteins in 293T cells from two independent biological  
10 replicates.

11 **B**, Quantification of the percentage of intrinsically disordered regions in the total proteome  
12 versus 3XF-WT PPIA-interacting nucleotide-binding proteins (BP) with nucleotide-binding  
13 domains containing an alpha-beta plait structure (InterPro identifier IPR012677). \*\*\* $p < 0.001$   
14 determined by Wilcoxon rank-sum test.

15 **C**, Spatial distribution of proline residues within secondary protein structures. The distribution of  
16 *cis*-prolines in structured vs disordered regions was compared with the Chi Square test with  
17 Yates' correction and is based on a meta-analysis of solved protein structures<sup>25</sup>.

18 **D**, Pulsed SILAC was performed with protein extracts from control or PPIA knockdown (Kd)  
19 cell lines in order to measure newly synthesized proteins, as described in Extended Data Fig. 8.

20 **E**, Uptake of heavy amino acids by control or PPIA Kd 293T cells was quantified following  
21 pulsed SILAC experiment. \*  $p < 0.05$ , \*\*  $p < 0.01$ , and \*\*\*  $p < 0.001$  determined by Wilcoxon rank-  
22 sum test.

Figure 2

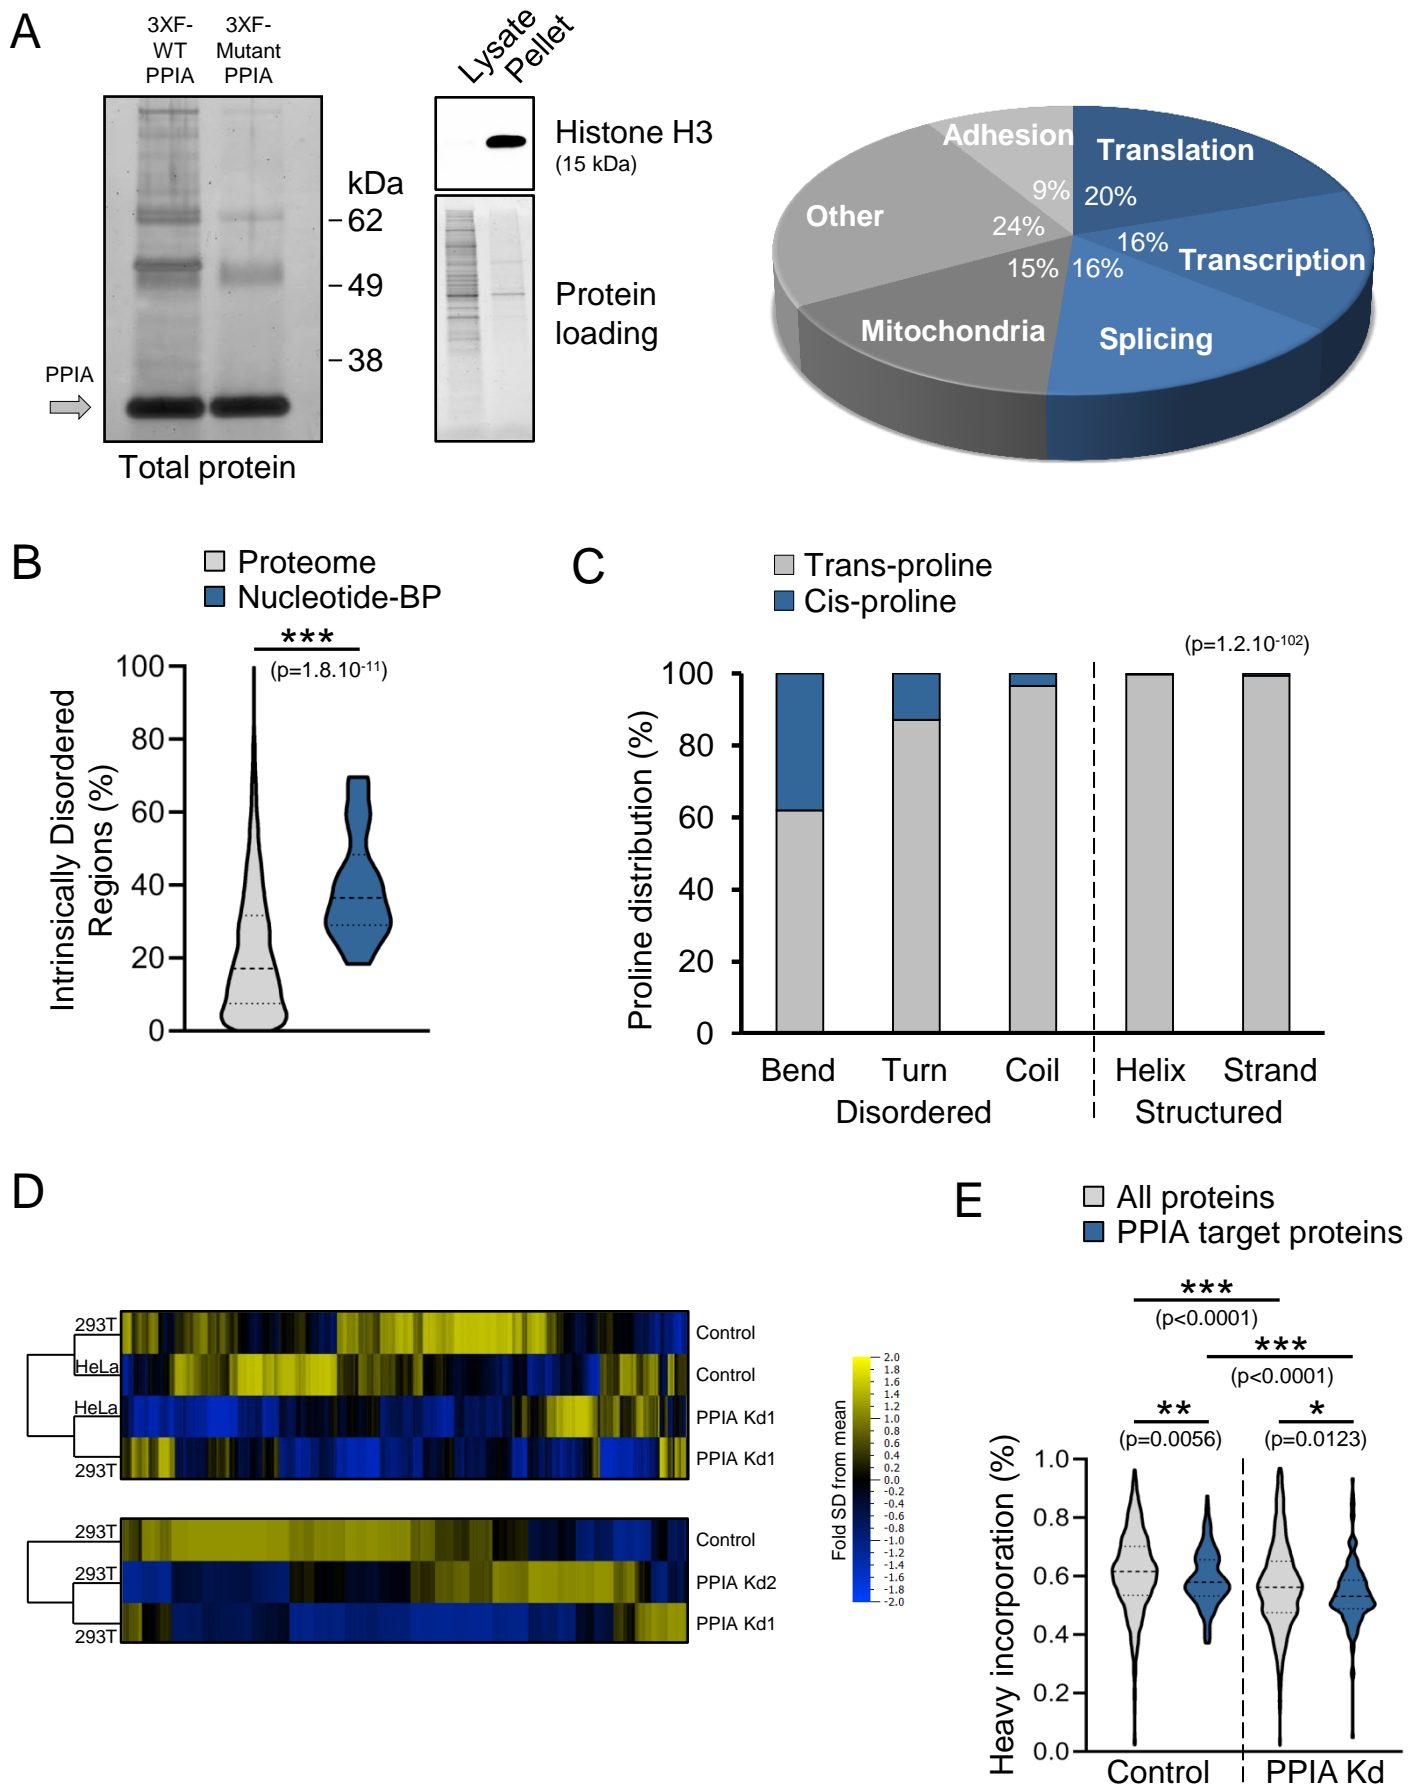

1 **Figure 3: PPIA and its IDR-rich substrate PABPC1 regulate protein phase separation.**

2 **A,** Mass spectra for control and PPIA Kd HeLa cells show changes in PABPC1 protein turnover  
3 measured by pulsed SILAC. The asterisks denote the peaks for PABPC1 peptides.

4 **B,** Immunoprecipitation of 3XF-WT PPIA and 3XF-Mutant PPIA in 293T cells was followed by  
5 Western blot analyses to detect poly(A)-binding protein 1 (PABPC1) and PPIA protein. The  
6 results were validated by more than three independent biological replicates.

7 **C,** Stress granule formation was visualized and quantified with G3BP1 staining after stress  
8 induction with sodium arsenite in HeLa control or PPIA Kd cells. DAPI, blue; G3BP1, green;  
9 scale bar=50  $\mu$ m. Fluorescence microscopy images are representative of three independent  
10 experiments. Data are mean  $\pm$  SD of three replicate wells; \*\* $p < 0.01$  by unpaired Student's two-  
11 tailed  $t$ -test for cell viability measurements; \*\*\* $p < 0.001$  by Wilcoxon rank-sum test for G3BP1  
12 granule counting.

13

Figure 3

A

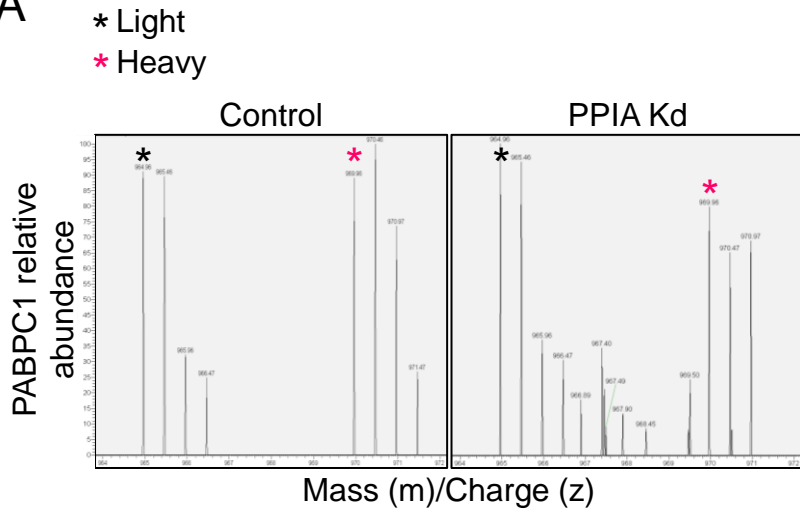

B

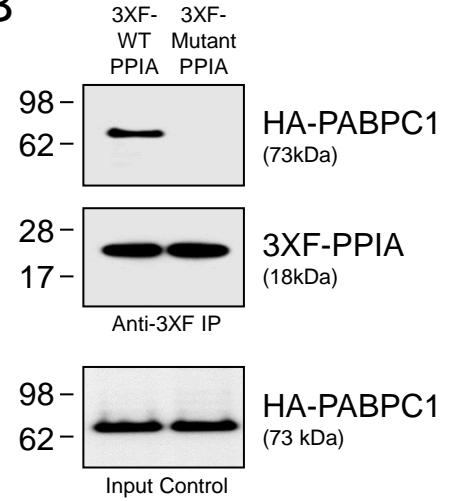

C

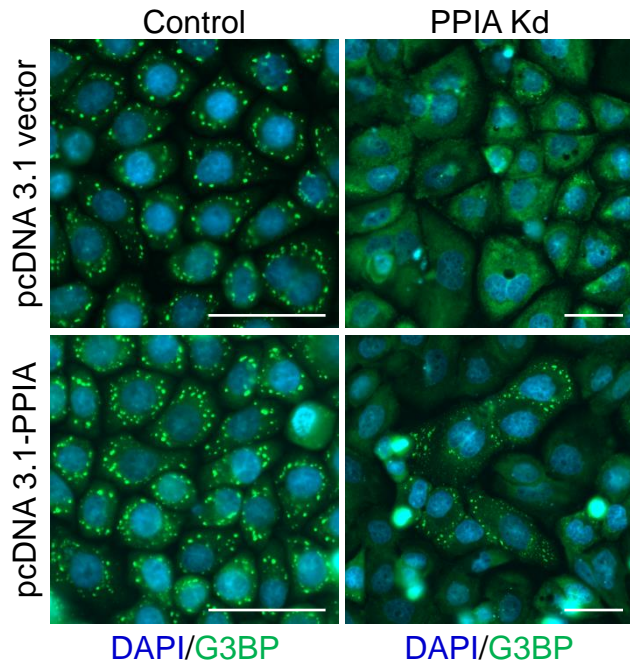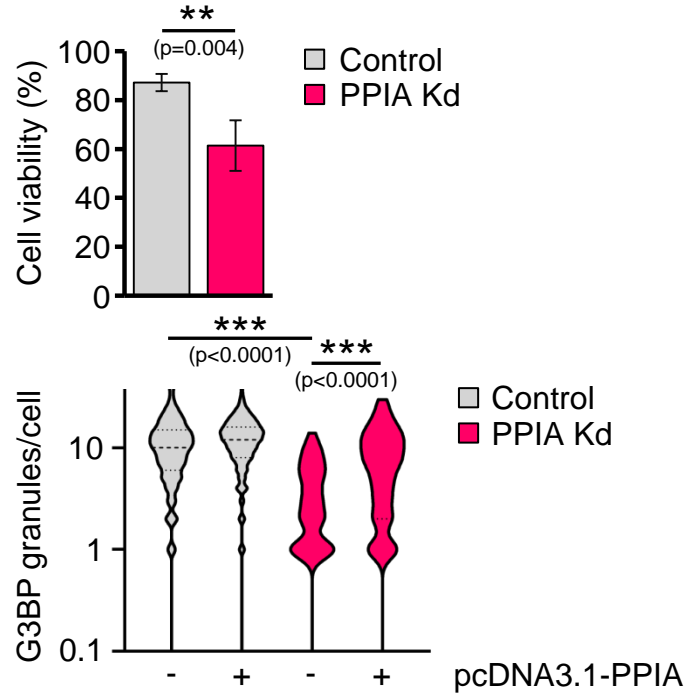

1 **Figure 4: PPIA levels decline with age and contribute to IDR protein deficiency in HSPCs.**

2 **A,** Proximity Ligation Assay (PLA) to quantify PPIA protein levels in mouse HSCs shows  
3 decreased PPIA expression in 23 month-old HSCs when compared to 5 month-old cells.  
4 Fluorescence microscopy images are representative of two independent biological replicates.  
5 DAPI, blue; PPIA, red; scale bar=5  $\mu\text{m}$ . \*\*\* $p < 0.001$  by unpaired Student's two-tailed  $t$ -test for  
6 quantification of PLA positive spots.

7 **B,** Quantification of intrinsically disordered region content in the mouse and human proteome  
8 (left panel) and transcriptome (right panel). Analysis of murine RNA-seq and MS/MS data was  
9 validated by a total of two independent experiments. \*\*  $p < 0.01$  and \*\*\*  $p < 0.001$  determined by  
10 Wilcoxon rank-sum test; NS, non-significant.

11 **C,** Quantification of the percentage of intrinsically disordered regions in the unique protein  
12 content of human lymphocytes versus granulocytes. \*\*\*  $p < 0.001$  determined by Wilcoxon rank-  
13 sum test.

14

15



Figure 4

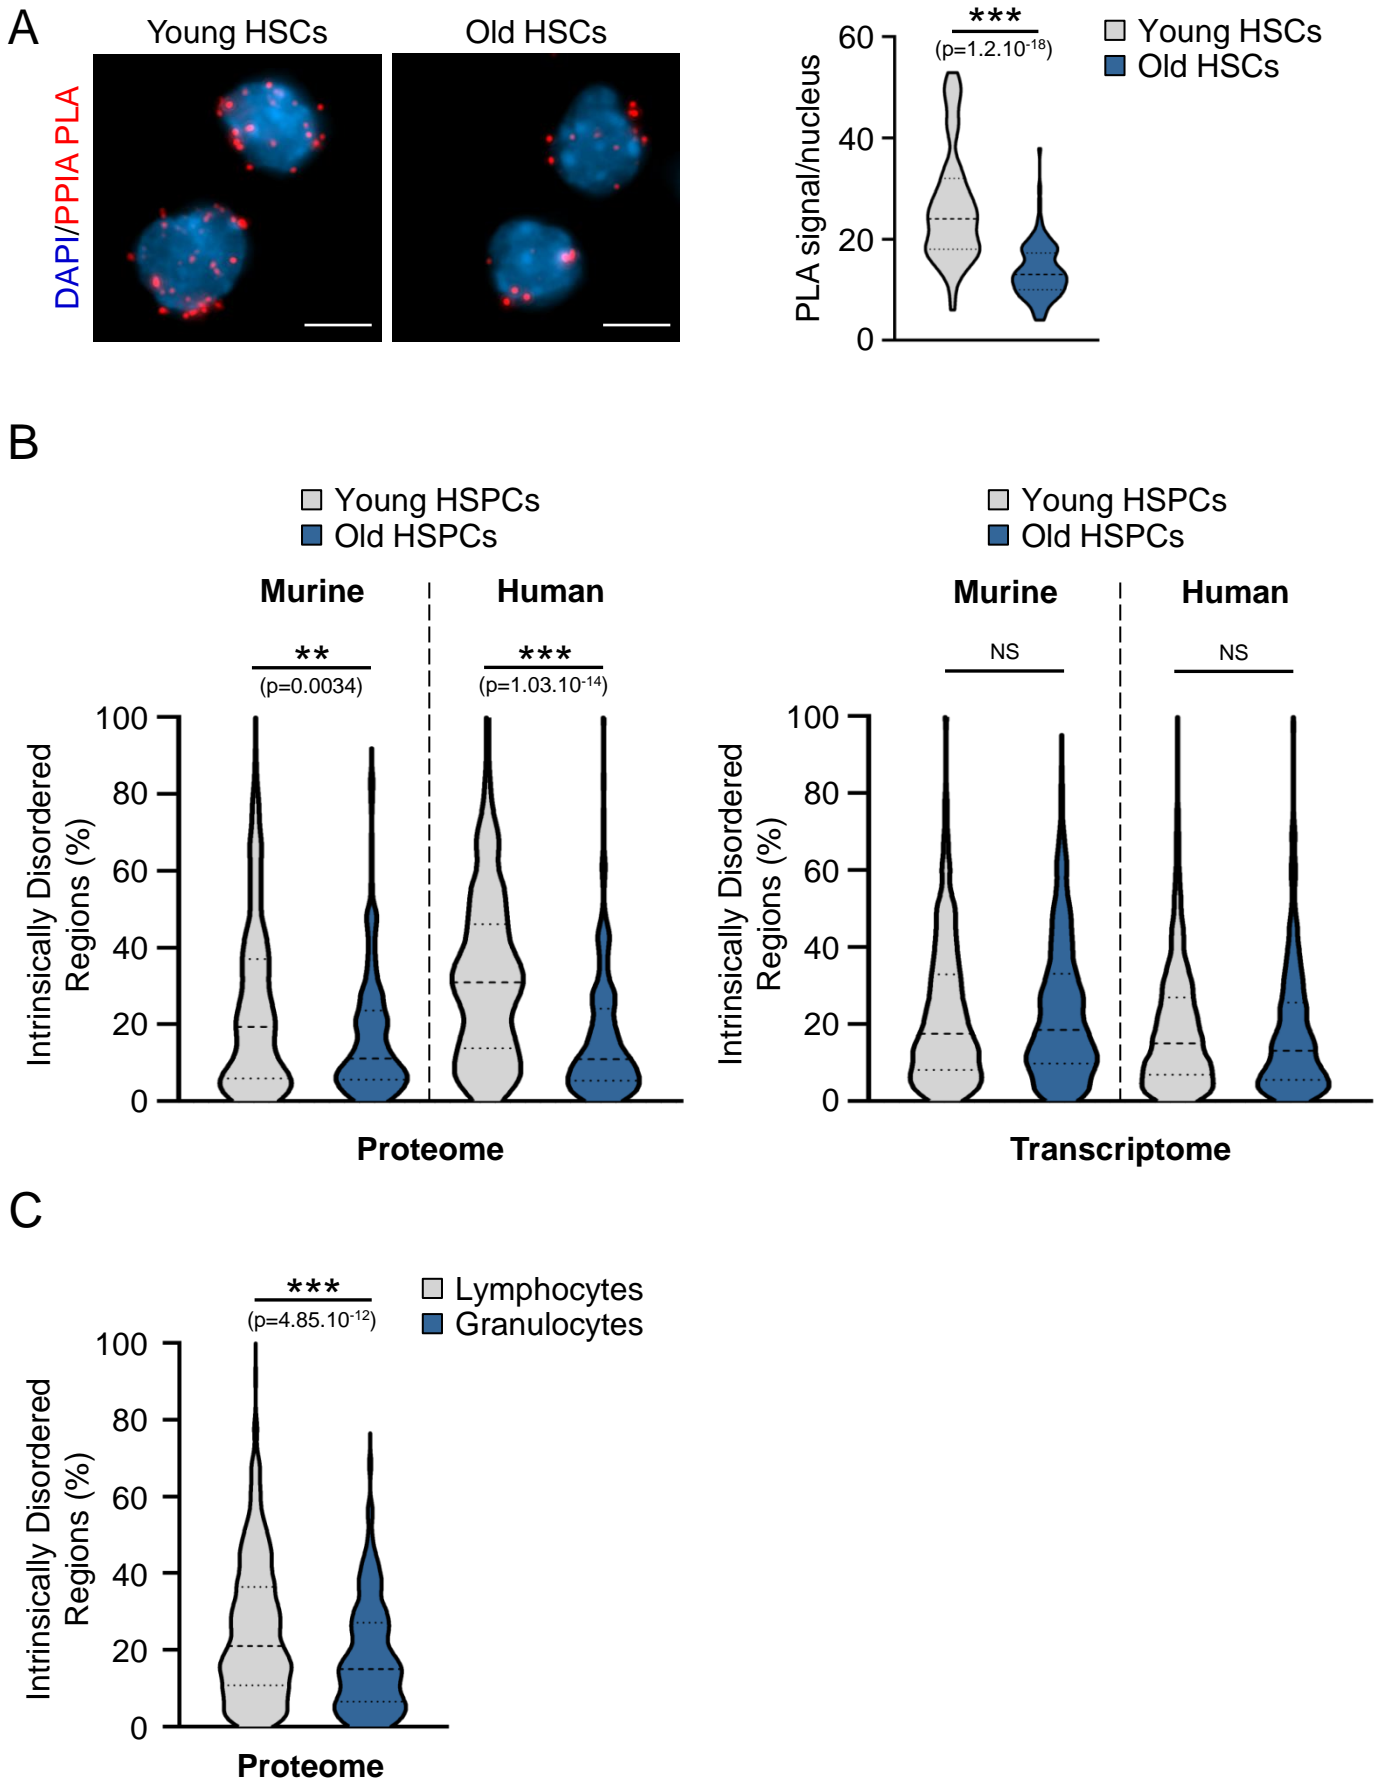

1 **Figure 5: Model of PPIA activity and function in the aging haematopoietic compartment.**

2 PPIA supports nascent proteins during translation and affects *cis*-proline isomerization in IDRs.

3 Therefore, proteins rich in IDRs require more foldase activity. IDRs are essential for phase

4 separation and also more highly expressed in the lymphoid compared to myeloid lineages. PPIA

5 expression decreases during haematopoietic aging and the aged proteome is consequently

6 depleted of proteins involved in phase separation and hampered in the production and function of

7 lymphocytes. In conclusion, PPIA deficiency impairs stress response in HSCs, biases lineage

8 commitment, and accelerates HSC aging.

Figure 5

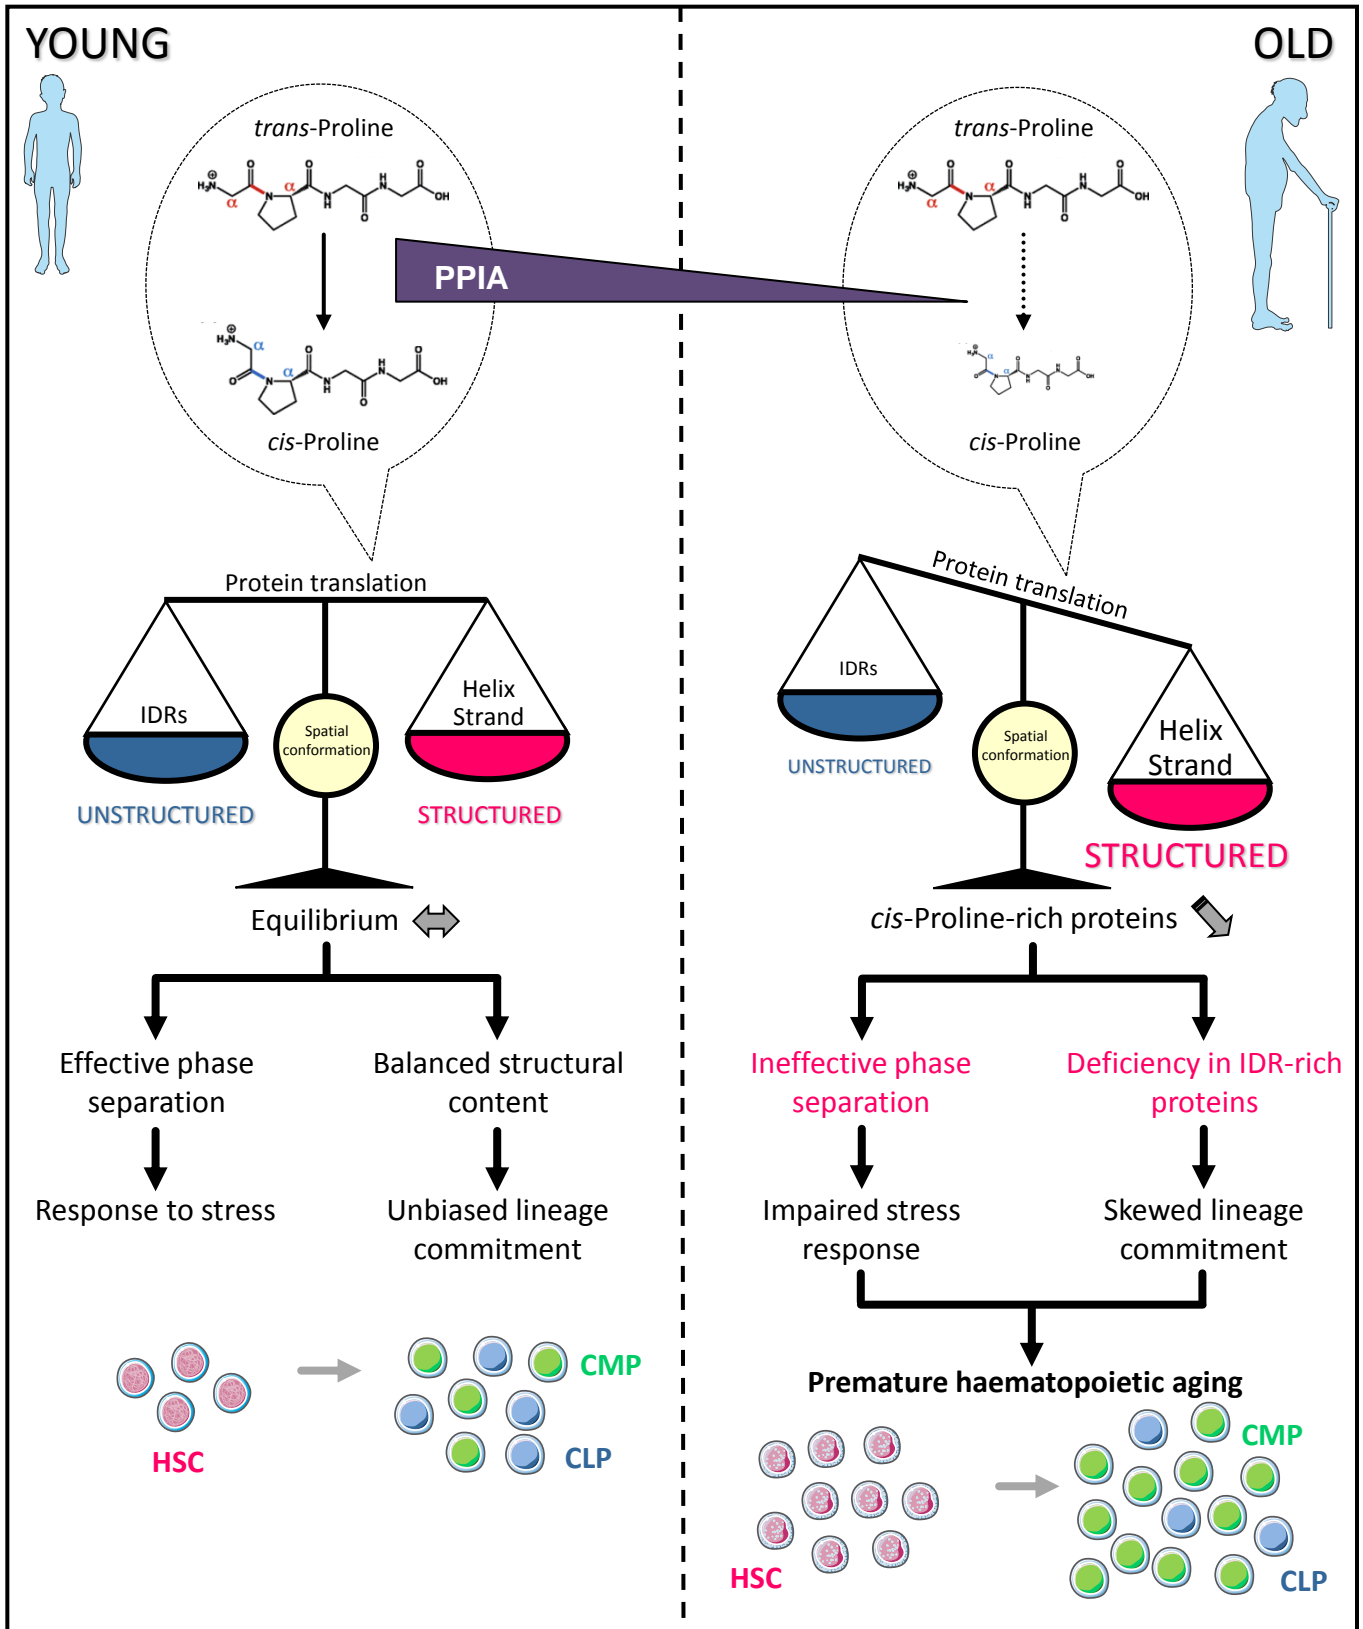

## 1 **Methods**

### 2 **2-D electrophoresis gels**

3 We used the Zoom IPGRunner system (Invitrogen) to separate proteins in two  
4 dimensions. We isolated HSPCs of young animals (4-8 months of age) and lysed them according  
5 to the manufacturer's instructions with urea, CHAPS, DTT, and ampholytes. CyDyes DIGE  
6 fluors (minimal dyes) were used according to the vendor (Amersham) with fluorophores Cy3 and  
7 Cy5 for post-lysis labelling to ensure that only 1-2% of lysines are labelled in a given protein.  
8 Labelling intensities were measured with a Typhoon FLA 9000 scanner and quantified with  
9 DeCyder 7.0 and ImageQuant software (GE Healthcare). We normalized total protein abundance  
10 based on protein size and lysine concentration for spots with known identity by MS/MS. PPIA  
11 quantity was identical in two independent experiments using different dyes.

12

### 13 **Tandem mass spectrometry (MS/MS)**

#### 14 Characterization of the mouse HSPC proteome following 2-D electrophoresis:

15 Following trypsinolysis, we analysed digested peptides by reverse-phase liquid  
16 chromatography electrospray ionization mass spectrometry using a Waters NANO-ACQUITY-  
17 UPLC, coupled to a Thermo LTQ linear ion-trap mass spectrometer. In order to identify proteins,  
18 we searched MS/MS spectra against the non-redundant NCBI protein database using SEQUEST  
19 program (<http://proteomicswiki.com/wiki/index.php/SEQUEST>).

#### 20 PPIA protein complex identification following 3XF-PPIA immunoprecipitation:

21 Immunopurified samples were analysed by mass spectrometer-based proteomics as  
22 previously described<sup>50</sup>. Minor modifications from the previously cited protocol are listed here.  
23 Digested peptides were injected into a nano-HPLC 1000 system (Thermo Scientific) coupled to  
24 LTQ Orbitrap Elite (Thermo Scientific) for first repeat and Q Exactive Plus (Thermo Scientific)

1 mass spectrometer for second repeat samples. Separated peptides were directly electro-sprayed  
2 into the mass spectrometer, controlled by the Xcalibur software (Thermo Scientific) in data-  
3 dependent acquisition mode, selecting fragmentation spectra of the top 25 and 35 strongest ions  
4 for 1<sup>st</sup> samples and 2<sup>nd</sup> samples, respectively. MS/MS spectra were searched against target-decoy  
5 human RefSeq database (released January 2019, containing 73637 entries) with the software  
6 interface and search parameters previously described<sup>50</sup>. Variable modification of methionine  
7 oxidation and lysine acetylation was allowed. Protein abundance was calculated with the iBAQ  
8 algorithm and relative protein amounts between samples were compared with an in-house  
9 processing algorithm<sup>51</sup>.

#### 10 Mouse HSPC global proteome profiling:

11 Whole bone marrow (BM) was isolated from the femurs and tibias of 3-month old and 21  
12 month-old wild-type male mice. Magnetic depletion of lineage-positive haematopoietic cells was  
13 performed using the EasySep mouse haematopoietic progenitor cell enrichment kit (Stem Cell  
14 Technologies), and lineage-depleted stem and progenitor cells were submitted to mass  
15 spectrometry analysis. Following sample lysis and overnight trypsin digestion, reconstituted  
16 peptidic fractions were loaded onto a nano-HPLC 1000 system (Thermo Fisher Scientific)  
17 coupled to an Orbitrap Fusion Lumos Tribrid mass spectrometer (Thermo Fisher Scientific), with  
18 identical acquisition settings as previously described<sup>52</sup>. Trap and capillary HPLC columns have  
19 been previously described<sup>50</sup>. The search of resultant MS/MS spectra against target-decoy mouse  
20 RefSeq database (released June 2015, containing 58549 entries) was done in Proteome  
21 Discoverer 2.1 interface (Thermo Fisher) with Mascot 2.4 algorithm (Matrix Science). Variable  
22 modifications allowed were methionine oxidation and protein N-terminal acetylation. Search  
23 settings were the following: precursor mass tolerance of 20 ppm, a maximum of two missed  
24 trypsin cleavages, and fragment ion mass tolerance of 0.5 Dalton. Assigned peptides were

1 filtered with 1% false discovery rate FDR. The in-house iFOT data processing algorithm<sup>51</sup> was  
2 used to calculate label free relative abundance of proteins in samples.

3 GO analyses were performed with the DAVID bioinformatic database  
4 (<https://david.ncifcrf.gov>). The degree of native protein disorder was determined using the  
5 openly available large-scale DisoDB database (<http://bioinfadmin.cs.ucl.ac.uk/disodb/>)<sup>28</sup>.  
6 DisoDB is based on an algorithm that predicts intrinsically unstructured segments and secondary  
7 structures in specific proteins with a confidence score, using available data from the Ensembl  
8 website (v.48). A disordered region was defined as a protein segment having at least 30  
9 contiguous disordered residues. Additionally, spatial conformation of proline residues was  
10 calculated based on previously published structures and with respect to the peptide bond  
11 conformation (*cis* or *trans*)<sup>25</sup>.

12

### 13 **Transplantations**

14 C57BL/6 mice were lethally irradiated with a Cs137 source at a single dose of 9.5 Gy up  
15 to 24 hours prior to transplantation.

#### 16 Peripheral blood (PB) and bone marrow (BM) cell analysis:

17 Cells were injected into the tail vein in 100  $\mu$ l PBS. 375,000 nucleated bone marrow cells  
18 of PPIA heterozygous (PPIA<sup>+/-</sup>) or knockout (PPIA<sup>-/-</sup>) mice (CD45.2<sup>+</sup>) were co-injected with the  
19 same number of CD45.1<sup>+</sup> competitor cells. We analysed PB at weeks 5, 8, 12, and 24 (shown are  
20 the 24 week analyses). Trend wise differences between PPIA knockout and heterozygous cells  
21 emerged at weeks 8 and 12 ( $p < 0.1$ ) and became statistically significant at the 24 week analysis.  
22 Final BM collection occurred at week 28.

23

24

1 Serial transplantations:

2 Equal numbers of BM cells (500,000 cells) from donor mice were mixed with 500,000  
3 competitor cells from wild-type mice and injected into lethally irradiated recipient mice. Two  
4 months after primary transplantation, 1,000,000 nucleated BM cells from the primary recipients  
5 were harvested for a second and again after 2 months for a third round of transplantation. Final  
6 evaluation was performed 6 months after the third transplantation. All donor and recipient  
7 animals were gender-matched and between 3-6 months of age. Separate experiments were  
8 conducted in male and female mice with identical results. Experiments had a statistical power of  
9 >90% and final results were based on at least five animals per group. Transplant recipient  
10 animals were randomly assigned at the time of irradiation and donor cells were pooled from up  
11 to three animals. PPIA<sup>+/-</sup> animals and cells were indistinguishable from wild-type animals and  
12 cells in all experiments tested (data not shown). PPIA<sup>+/-</sup> mice were generated by backcrossing  
13 into C57BL/6J for over ten generations.

14

15 **Mice**

16 PPIA<sup>+/-</sup>, PPIA<sup>-/-</sup>, and C57BL/6 wild-type animals used in transplantation studies were  
17 kept at the Massachusetts General Hospital (MGH) Simches facility under pathogen-free  
18 conditions and treated according to MGH Institutional Animal Care and Use Committee  
19 (IACUC)-approved protocols. PPIA<sup>-/-</sup> mice were born at sub-Mendelian ratios but displayed no  
20 abnormal phenotype after multiple generations of backcrossing to the C57BL/6 genetic  
21 background. All procedures on mice were performed with approval from the MGH and Baylor  
22 College of Medicine IACUC and followed guidelines from the National Institutes of Health  
23 Guide for the Care and Use of Laboratory Animals. All mice were housed in ventilated cages, on

1 a standard rodent diet of chow and water *ad libitum*, under a 12-hour light/dark cycle. Animals  
2 with signs of sickness or infection were excluded from the study.

3

#### 4 **Cell analysis and FACS**

5 First, freshly isolated PB and BM were initially depleted of lineage positive cells with  
6 MACS LD columns (Miltenyi Biotec), as previously described<sup>53</sup>. Then, cells were analysed with  
7 an LSR II instrument and isolated with an Aria I fluorescence-activated cell sorter (BD  
8 Biosciences).

9 The following antibody combinations were used for cell phenotyping: HSPC (c-Kit<sup>+</sup>,  
10 lineage<sup>-</sup>), LKS (c-Kit<sup>+</sup>, Sca1<sup>+</sup>, lineage<sup>-</sup>), CMP (c-Kit<sup>+</sup>, Sca1<sup>-</sup>, lineage<sup>-</sup>, CD16/32<sup>-</sup>, CD34<sup>+</sup>), CLP  
11 (c-Kit<sup>int.</sup>, Sca1<sup>int.</sup>, lineage<sup>-</sup>, CD127<sup>+</sup>, CD34<sup>+</sup>), HSC (c-Kit<sup>+</sup>, Sca1<sup>+</sup>, lineage<sup>-</sup>, CD135<sup>-</sup>, CD34<sup>-</sup>,  
12 CD150<sup>+</sup>). Immunostainings were performed by incubating cells with anti-c-Kit (clone 2B8, BD  
13 Biosciences or Life Technologies), anti-Sca1 (clone D7, Caltag Medsystems or Thermo Fisher  
14 Scientific), anti-CD16/32 (clone 93, eBioscience), anti-CD34 (clone RAM34, BD Biosciences),  
15 anti-CD135 (clone A2F10.1, BD Biosciences), anti-CD150 (clone TC15-12F12.2, BioLegend),  
16 anti-CD127 (clone SB/199, BioLegend) and anti-CD45.1/2 (clones A20 and 104, BioLegend)  
17 antibodies for 30 min (PB) or 60 min (BM) at 4°C prior to FACS analyses.

18 The antibodies used for lineage depletion were anti-CD11b (clone M1/70, BD  
19 Biosciences), anti-Ly-6G and Ly-6C (clone RB6-8C5, BD Biosciences), anti-CD8α (clone 53-  
20 6.7, BD Biosciences), anti-CD3ε (clone 145-2C11, BD Biosciences), anti-CD4 (clone GK1.5,  
21 BD Biosciences), anti-TER-199 (clone TER-119, BD Biosciences), anti-CD45R (clone RA3-  
22 6B2, BD Biosciences) and streptavidin (S32365, Thermo Fisher Scientific). The source of the  
23 samples was blinded to the FACS analyst.

24



## 1 **Cell culture and Drug treatments**

2 Biochemical assays were performed in 293T or HeLa cells which were maintained at  
3 37 °C in a humidified incubator containing 5% CO<sub>2</sub>. Cell lines were purchased from ATCC,  
4 cultured with the medium composition recommended by the supplier, and monitored for signs of  
5 infection, including mycoplasma contamination.

6 Stable 293T or HeLa control and PPIA Kd1/Kd2 cell lines were generated using pLKO.1  
7 lentiviral vectors encoding short hairpin RNAs targeting the human PPIA protein (clone ID#  
8 TRCN0000049171 (Kd1) or clone ID# TRCN0000049170 (Kd2), Horizon Discovery) designed  
9 by The RNAi Consortium (TRC). Cell lines stably transduced with a pLKO.1 TRC empty vector  
10 encoding a non-targeting sequence (clone ID# TRC TRCN0000241922, Horizon Discovery)  
11 served as controls. Following puromycin selection (2 µg/ml, Gibco, Fisher Scientific), PPIA  
12 knockdown efficiency was assessed by measuring PPIA protein expression by Western blots in  
13 stably transduced cells (Extended Data Fig. 7). The two constructs PPIA Kd1 and PPIA Kd2  
14 showed >80% knockdown efficiency by immunoblot and were tested independently.

15 Control and PPIA Kd1 HeLa cells were transfected with pcDNA3.1-PPIA vector or  
16 corresponding pcDNA3.1 control vector for 48h. Following stress induction with sodium  
17 arsenite (50 µM, Sigma Aldrich) for 1h, immunostaining for G3BP1 protein, a marker of stress  
18 granule assembly, was performed using a rabbit polyclonal anti-G3BP1 antibody (Cat. #13057-  
19 2-AP, Proteintech). The cells were mounted by Prolong gold antifade mounting medium  
20 containing DAPI (Invitrogen) and were imaged at 20X magnification on a Celldiscoverer 7  
21 confocal microscope (Zeiss) operated with the Zen pro imaging software (Zeiss). The exposure  
22 time and gain were maintained at a constant level for all samples, and the stress granule analysis  
23 was carried out with the ImageJ software. Cell viability was measured on a Cellometer Auto  
24 2000 automated cell counter with the ViaStain AO/PI staining solution (Nexcelom Bioscience).

1 Fig. 1, 4A, and 4B are based on freshly isolated murine HSPCs and HSCs. Fig. 2A, 2B,  
2 2C, 2D, 2E, and 3B show experiments with 293T cells. Fig. 2D and 3C were performed in HeLa  
3 cells.

4

#### 5 **Immunoprecipitations and Western blots**

6 Immunoprecipitations of 3XF-PPIA and 3XF-Mutant PPIA transiently transfected cells  
7 were performed with a mouse monoclonal anti-FLAG antibody (clone M2, Millipore Sigma) in  
8 293T cells. 3XF-Mutant PPIA (G104A mutant) has reduced catalytic activity due to blocked  
9 substrate access to the active site<sup>23</sup>. IP was performed on the cytoplasmic fraction of the cells.  
10 Western blots were done with a rat monoclonal anti-HA high-affinity antibody (clone 3F10,  
11 Millipore Sigma), a rabbit polyclonal anti-histone H3 antibody (ab1791, Abcam), and a rabbit  
12 polyclonal anti-cyclophilin A antibody (#2175, Cell Signaling Technology).

13

#### 14 **Pulsed SILAC (Stable Isotope Labelling with Amino acids in Cell culture)**

15 The workflow of the pulsed SILAC experiment performed in this study is described in  
16 Extended Data Fig. 8. First, control and PPIA knock-down (Kd) HeLa or 293T cells were  
17 cultured for five days in standard DMEM medium. Once cells have reached a similar confluence  
18 level (~50%), heavy isotope (<sup>13</sup>C-<sup>15</sup>N-Lysine and <sup>13</sup>C-<sup>15</sup>N-Arginine)-containing DMEM medium  
19 (Thermo Fisher Scientific) was added in excess to the cells for 24 h. Cells were harvested and  
20 100 µg of protein cell lysates from each cell type and condition were subjected to acetone  
21 precipitation; subsequent denaturation, reduction, and alkylation prior to overnight in-solution  
22 digestion at 37°C with trypsin in order to generate peptides for mass spectrometry. Digestions  
23 were terminated by adding equal volume of 2% formic acid, and then desalted with Oasis HLB 1  
24 ml reverse phase cartridges (Waters) according to the vendor's procedure.

1 Liquid chromatography-tandem mass spectrometry (LC-MS/MS) analysis:

2 An aliquot of the tryptic digest was analysed by LC-MS/MS on an Orbitrap Fusion  
3 Tribrid mass spectrometer (Thermo Scientific) interfaced with an UltiMate 3000 Binary  
4 RSLCnano System (Dionex), as previously described<sup>54</sup>. In our experiments, dynamic exclusion  
5 was employed for 40 s.

6 Data processing and analysis:

7 The raw proteomic files were processed with the Proteome Discoverer 1.4 software  
8 (Thermo Scientific) and MS/MS spectra were searched against Uniprot-Homo sapiens database  
9 using the SEQUEST HT search engine. The spectra were also searched against decoy database  
10 using a peptide target false discovery rate (FDR) set to <1% and < 5%, for stringent and relaxed  
11 matches, respectively. The search parameters allowed for a maximum of two missed trypsin  
12 cleavages and set MS/MS tolerance to 0.6 Da. Carbamidomethylation on cysteine residues was  
13 used as fixed modification while oxidation of methionine as well as SILAC heavy arginine (<sup>13</sup>C<sub>6</sub>-  
14 <sup>15</sup>N<sub>4</sub>), and SILAC heavy lysine (<sup>13</sup>C<sub>6</sub>-<sup>15</sup>N<sub>2</sub>) were set as variable modifications. Quantification of  
15 SILAC pairs was performed with the Proteome Discoverer software. Precursor ion elution  
16 profiles of heavy vs. light peptides were determined with a MS tolerance of 3 ppm. The area  
17 under the curve was used to determine a SILAC ratio for each peptide.

18

19 **Proximity Ligation Assay (PLA)**

20 Whole bone marrow was obtained from the hind limb long bones and hip bones of young  
21 and old animals (5 month-old and 23 month-old, respectively). Lineage-positive cells were  
22 isolated using the Direct Lineage Cell depletion kit (Miltenyi Biotec) and magnetically depleted  
23 with an AutoMACS Pro Separator (Miltenyi Biotec). Then, the lineage-negative fraction was  
24 resuspended at a concentration of 10<sup>8</sup> cells/ml and stained on ice for 15 min with the

1 combination of antibodies characterizing HSCs described in the “Cell analysis and FACS”  
2 section above. Cell sorting was carried out on an Aria I FACS instrument (BD Biosciences).  
3 Finally, isolated HSCs were cytopinned, attached onto a Cellview slide (#543979, Greiner Bio-  
4 one), and fixed in 4% paraformaldehyde.

5 To quantify PPIA expression, proximity ligation assays were performed on isolated HSCs  
6 with the Duolink in Situ Red Starter Kit Mouse/Rabbit (DUO92101, Millipore Sigma), adapting  
7 the vendor’s protocol for HSCs. Briefly, HSCs were permeabilized with PBS + 0.5% Triton X-  
8 100 for 7 min, washed with PBS, and blocked in 5% donkey serum for 30 min at room  
9 temperature. After a short wash in PBS, slides were incubated in a humidity chamber for 1 h at  
10 37°C with Duolink blocking solution. Then, primary antibodies (mouse anti-cyclophilin A  
11 antibody, ab58114, and rabbit anti-cyclophilin A antibody, ab41684; both from Abcam) were  
12 applied overnight at 4°C in a humidity chamber. After washing the samples twice with Duolink  
13 buffer A, the diluted anti-mouse PLUS and anti-rabbit MINUS PLA probes were added to the  
14 samples for 1 h at 37°C in a pre-heated humidity chamber. Following two washes with buffer A,  
15 the cells were incubated with a DNA ligase previously diluted in Duolink Ligation buffer for 30  
16 min at 37°C. Then, samples were washed twice in Duolink buffer A under gentle shaking and  
17 incubated with a diluted DNA polymerase solution for 1 h 40 min at 37°C in the dark. Finally,  
18 slides were rinsed twice in 1X wash buffer B for 10 min and once in 0.01X wash buffer B for 1  
19 min at room temperature and mounted with Duolink *in situ* mounting medium containing DAPI.  
20 For each PPIA antibody, a negative control experiment was performed where only one antibody  
21 or no antibody was incubated with the PLA probes (data not shown). Fluorescence was  
22 visualized with a Celldiscoverer7 confocal microscope (Zeiss) at 100X magnification and images  
23 were processed for background subtraction and orthogonal projection with the ZEN Pro imaging

1 software (Zeiss). The experimenter was blinded to the origin of the samples during the PLA  
2 staining and spot counting. An average of 90 cells per condition was counted.

3

#### 4 **RNA-sequencing (RNA-seq)**

##### 5 Isolation and selection of HSPCs:

6 Wild-type HSPCs were isolated from the hind limb long bones of 4 to 6 month-old and  
7 31 to 33 month-old male mice. c-Kit<sup>+</sup> cells were stained and magnetically isolated from the  
8 lineage-depleted cell suspension using the EasySep mouse CD117 (c-Kit) positive selection kit  
9 (Stem Cell Technologies), following the manufacturer's instructions. After overnight growth in  
10 serum-free medium (StemSpan SFEM, Stem Cell Technologies), supplemented with murine  
11 TPO (20 ng/ml, PeproTech), SCF (10 ng/ml, PeproTech), and the beta-Catenin agonist  
12 CHIR99021 (250 nM, Stemgent), HSPCs were harvested as cell pellets. Immediately after, RNA  
13 extraction was carried out with the RNeasy Plus Mini kit with genomic DNA Eliminator  
14 columns (Qiagen) in combination with on-column DNaseI digestion (Qiagen), according to the  
15 vendor's protocol.

##### 16 Preparation and sequencing of RNA-seq libraries:

17 Total RNA-seq libraries were generated and prepared for multiplexing on the Illumina  
18 platform with the TruSeq stranded total RNA library prep (Illumina) according to manufacturer's  
19 protocol. Libraries included ERCC ExFold RNA spike-in mixes (Thermo Fisher Scientific) to  
20 assess the platform dynamic range. RNA spike-in mixes confirmed high fidelity between two  
21 independent NGS runs ( $R^2 = 0.991$  and  $0.943$ , respectively) (SI-Mouse HSPCs RNA seq). The  
22 resultant libraries were quality-checked on a Bioanalyzer 2100 instrument (Agilent) and  
23 quantified with a Qubit fluorometer (Thermo Fisher Scientific). Further quantification of the  
24 adapter ligated fragments and confirmation of successful P5 and P7 adapter incorporations were

1 assessed with the KAPA universal library quantification kit for Illumina (Roche) run on a ViiA7  
2 real-time PCR system (Applied Biosystems). Multiplexed and equimolarly pooled library  
3 products were re-evaluated on the Bioanalyzer 2100 and diluted to 18 pM for cluster generation  
4 by bridge amplification on the cBot system. Then, libraries were loaded onto a HiSeq2500 rapid  
5 run mode flowcell v2, followed by paired-end 100 cycle sequencing run on a HiSeq2500  
6 instrument (Illumina). PhiX Control v3 adapter-ligated library (Illumina) was spiked-in at 2% by  
7 weight to ensure balanced diversity and to monitor clustering and sequencing performance. We  
8 obtained a minimum of 50 million reads per sample.

#### 9 Data processing:

10 Fastq file generation was achieved with the Illumina's BaseSpace Sequence Hub.  
11 Demultiplexing was based on sample-specific barcodes. All bioinformatic analyses were  
12 performed with Linux command line tools. After removing the short sequence reads which did  
13 not pass quality control and discarding reads containing adaptor sequences with Cutadapt  
14 v.1.12<sup>55</sup>, sequence reads were assembled and mapped against the mouse MM9 reference genome  
15 (Genome Reference Consortium) with TopHat2/Bowtie2 v.2.1.0<sup>56</sup>. Gene expression changes  
16 were quantified with Cufflinks and Cuffdiff v.2.1.1<sup>57</sup> and data were normalized by calculating  
17 the fragments per kilobase per million mapped reads (FPKM).

18

#### 19 **Statistics**

20 All statistical analyses were performed using Stata v.12, Stata v.15.1, or GraphPad Prism  
21 8 software. Statistical analysis for individual gene analyses and transplantation data was  
22 performed using a two-tailed Student's *t*-test while large datasets were compared with a two-  
23 sided Wilcoxon rank-sum test or a Chi square test with Yates' correction. On violin plots, the  
24 dashed line marks the median and the dotted lines represent the lower and upper quartiles.

## 1 **Data Availability**

2           Mass spectrometry data obtained after 3XF-PPIA immunoprecipitation (Fig. 2A) are  
3 deposited with the ProteomeXchange Consortium (<http://proteomecentral.proteomexchange.org/>)  
4 via the MASSIVE repository (MSV000083867) with the dataset identifier PXD014025.

5           The datasets generated in the mouse HSC proteome profiling (Fig. 4B) have been  
6 deposited to the ProteomeXchange Consortium via the MASSIVE repository (MSV000083845)  
7 with the dataset identifier PDX013995. For human HSPC/lymphocyte/granulocyte proteome and  
8 transcriptome, results from a previously published report were analysed<sup>47</sup>. HSPC data analysis  
9 was based on levels of mRNA and proteins belonging to age-affected pathways in individual  
10 HSPC population. “Pathways were required to have between 5 and 150 members to be  
11 sufficiently covered and to have at least 20% of its quantified components being significantly  
12 altered upon aging”, as defined by the original authors. Lymphocyte and granulocyte peptide  
13 comparison was based on the percentage of IDRs per protein for polypeptides that are unique to  
14 lymphocytes or unique to granulocytes. Rare peptides that were identified in less than 50% of the  
15 pooled lymphocyte and the pooled granulocyte analyses were excluded.

16           For transcriptomic analysis of murine HSPCs (SI-Mouse HSPCs RNA seq), raw and  
17 processed RNA-seq data have been deposited with the Gene Expression Omnibus (GEO)  
18 database under accession code GSE151125.

19

## 1 **Methods References**

2

3 50 De Maio, A. *et al.* RBM17 Interacts with U2SURP and CHERP to Regulate Expression  
4 and Splicing of RNA-Processing Proteins. *Cell reports* **25**, 726-736.e727,  
5 doi:10.1016/j.celrep.2018.09.041 (2018).

6 51 Jung, S. Y. *et al.* An Anatomically Resolved Mouse Brain Proteome Reveals Parkinson  
7 Disease-relevant Pathways. *Molecular & cellular proteomics : MCP* **16**, 581-593,  
8 doi:10.1074/mcp.M116.061440 (2017).

9 52 Ferreon, J. C. *et al.* Acetylation Disfavors Tau Phase Separation. *International journal of*  
10 *molecular sciences* **19**, doi:10.3390/ijms19051360 (2018).

11 53 Lo Celso, C., Lin, C. P. & Scadden, D. T. In vivo imaging of transplanted hematopoietic  
12 stem and progenitor cells in mouse calvarium bone marrow. *Nature protocols* **6**, 1-14,  
13 doi:10.1038/nprot.2010.168 (2011).

14 54 Mai, T. T., Tran, D. Q., Roos, S., Rhoads, J. M. & Liu, Y. Human Breast Milk Promotes  
15 the Secretion of Potentially Beneficial Metabolites by Probiotic *Lactobacillus reuteri*  
16 DSM 17938. *Nutrients* **11**, doi:10.3390/nu11071548 (2019).

17 55 Martin, M. Cutadapt removes adapter sequences from high-throughput sequencing reads.  
18 *2011* **17**, 3, doi:10.14806/ej.17.1.200 (2011).

19 56 Kim, D. *et al.* TopHat2: accurate alignment of transcriptomes in the presence of  
20 insertions, deletions and gene fusions. *Genome biology* **14**, R36, doi:10.1186/gb-2013-  
21 14-4-r36 (2013).

22 57 Trapnell, C. *et al.* Differential analysis of gene regulation at transcript resolution with  
23 RNA-seq. *Nature biotechnology* **31**, 46-53, doi:10.1038/nbt.2450 (2013).



1 58 Selbach, M. *et al.* Widespread changes in protein synthesis induced by microRNAs.  
2 *Nature* **455**, 58-63, doi:10.1038/nature07228 (2008).

## 4 **Acknowledgements**

5 A.C. was supported by the Cancer Prevention and Research Institute of Texas (CPRIT-  
6 RR140038), the Ted Nash Long Life Foundation, and NIH R01DK115454. We would like to  
7 thank Dr. Margaret Goodell and Dr. Joanne Ino Hsu for helpful discussions, Catherine Gillespie  
8 for editorial assistance, and Laura Prickett-Rice and Kat Folz-Donahue for FACS support.

9 We acknowledge the Genomic and RNA Profiling Core (supported by NIH-NIDDK  
10 P30DK56338 Center grant, NIH-NCI P30CA125123 Center grant, and NIH 1S10OD02346901  
11 S10 grant), the Cytometry and Cell Sorting Core (supported by CPRIT Core Facility Support  
12 Award (CPRIT-RP180672) and NIH (CA125123 & RR024574) grants), and the Mass  
13 Spectrometry Proteomics Core (supported by NIH-NCI P30CA125123 Center grant and CPRIT  
14 Core Facility Support Award (CPRIT-RP170005)) at Baylor College of Medicine for their  
15 technical support. We thank Li Li and Dr. Sheng Pan at the Clinical and Translational  
16 Proteomics Service Center at the University of Texas Health Science Center for assistance with  
17 the generation and analysis of the pulsed SILAC MS data.

## 19 **Author Contributions and Competing Interest Declaration**

20 L.M. designed and conducted molecular assays, interpreted results, and wrote the  
21 manuscript. P.I. conducted molecular assays, interpreted results, and contributed to manuscript  
22 preparation. S.E.M. helped with the acquisition of microscopy images. D.B.S., C.T.H., D.S.K.,  
23 and B.S. helped with *in vitro* assays and functional haematopoietic assays and edited the  
24 manuscript. E.S. (Whitehead Institute) and J.C.K. were involved in protein identification. B.C.B.

1 supported the *in vivo* studies, discussions, interpreted data, and edited the manuscript. E.S.  
2 (Baylor College of Medicine) supported data analysis and edited the manuscript. D.T.S. co-  
3 supervised the haematopoietic aspects of this study, interpreted data, and edited the manuscript.  
4 A.C. supervised this study and was involved in all experimental aspects, conceived the project,  
5 analysed data, and wrote the manuscript.

6 Supplementary Information is available for this paper. Correspondence and requests for  
7 materials should be addressed to A.C. The authors declare no competing financial interests.

8

## 9 **Extended Data**

10

11

## Extended Data Fig. 1

MVNPTVFFDI TADDEPLGRV SFELFADKVP KTAENFRALS TGEKGFYKYG  
SSFHRIIPGF MCQGGDFTRH NGTGGRSIYG EKFEDENFIL KHTGPGILSM  
ANAGPNTNGS OFFICTAKTE WLDGKHVVFG KVKEGMNIVE AMERFGSRNG  
KTSKKITISD CGQL

## Extended Data Fig. 2

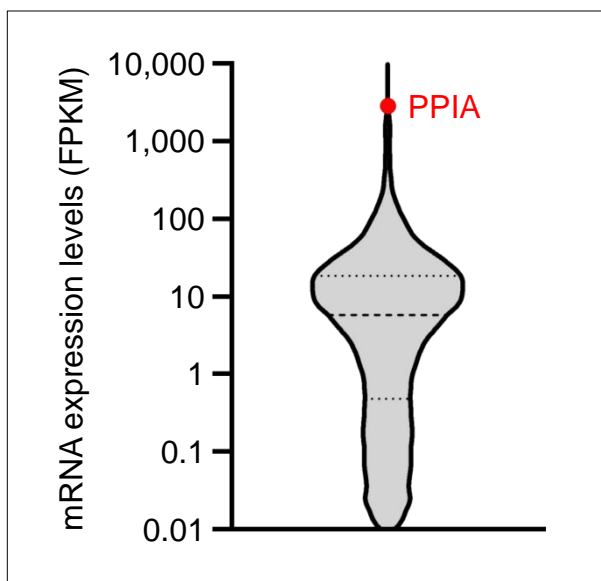

## Extended Data Fig. 3

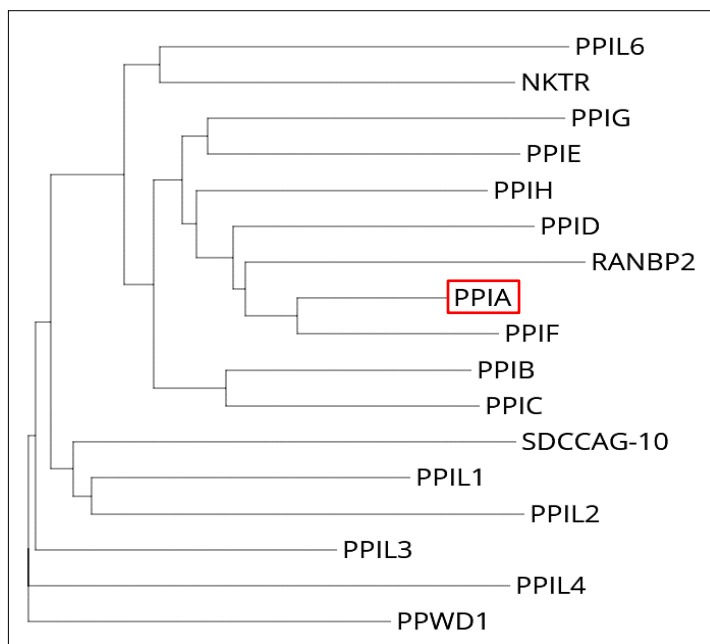

## Extended Data Fig. 4

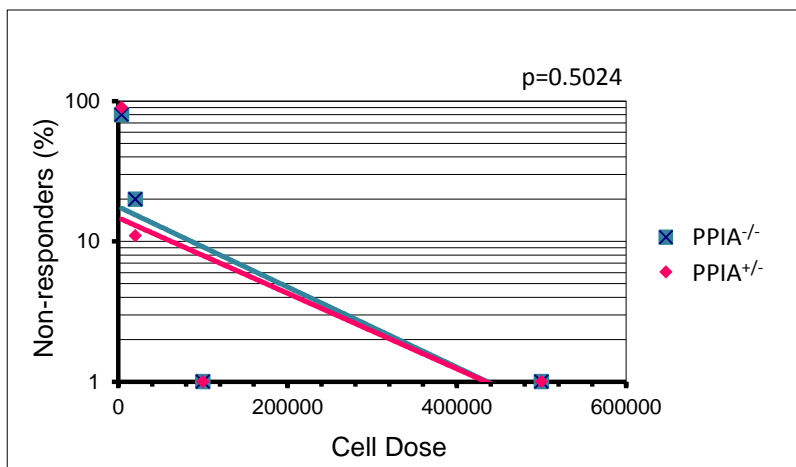

## Extended Data Fig. 5

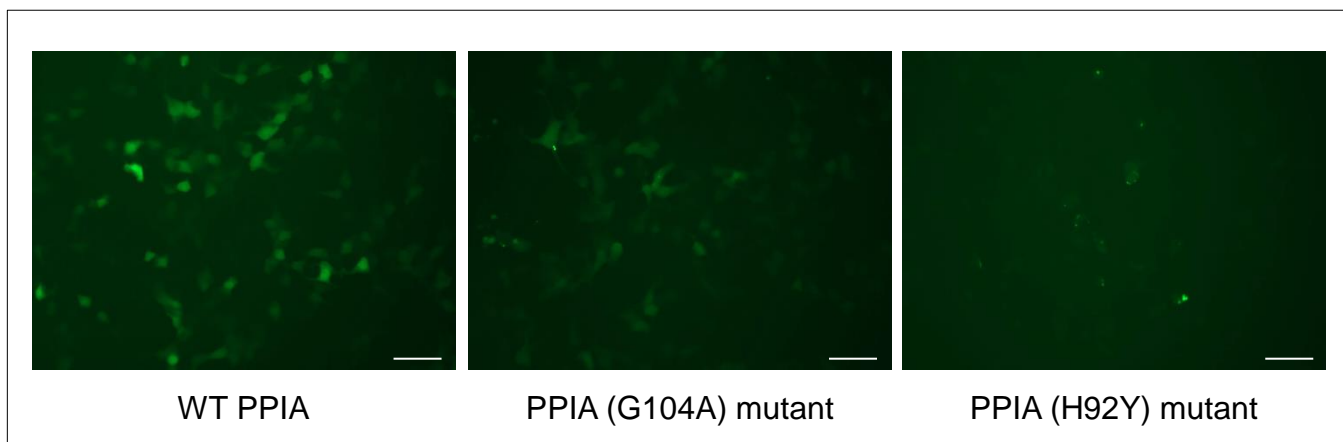

## Extended Data Fig. 6

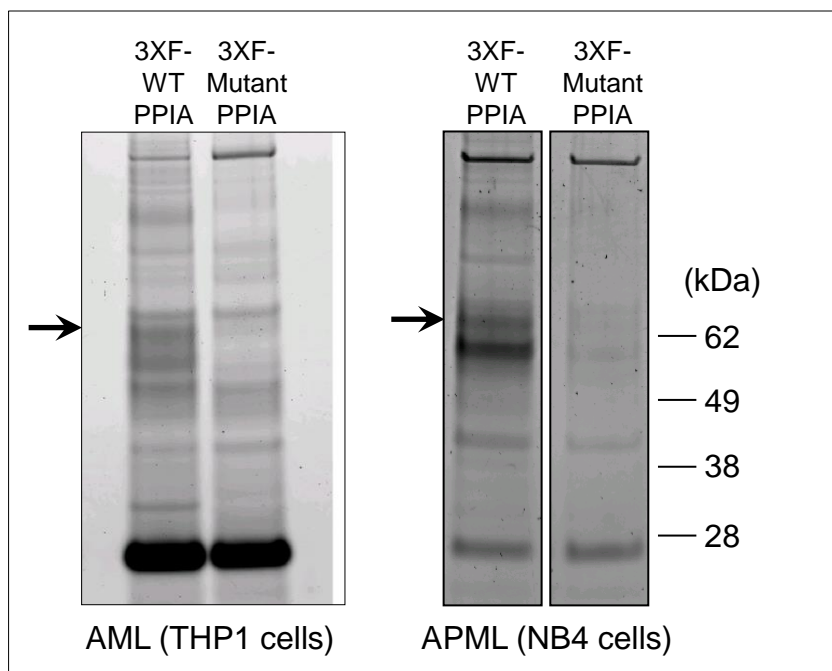

## Extended Data Fig. 7

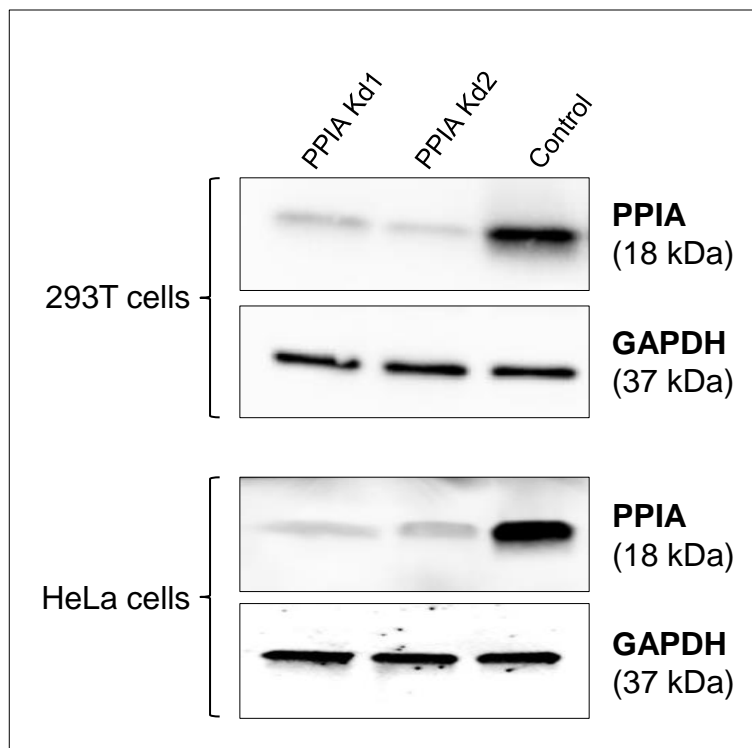

## Extended Data Fig. 8

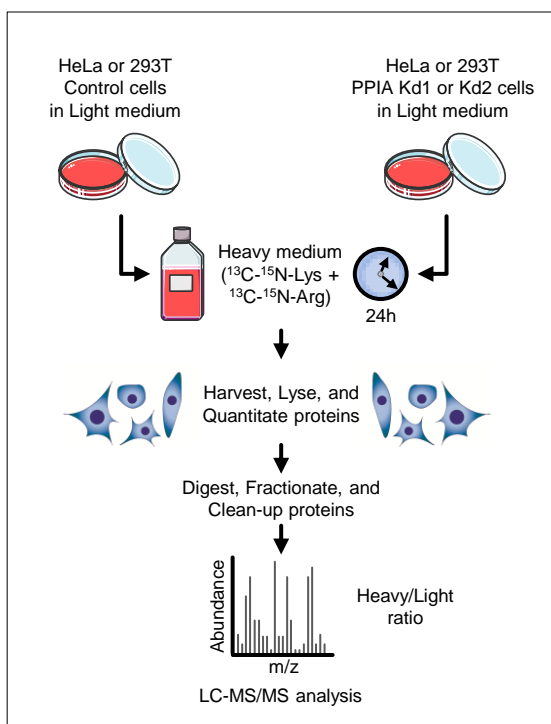

## Extended Data Fig. 9

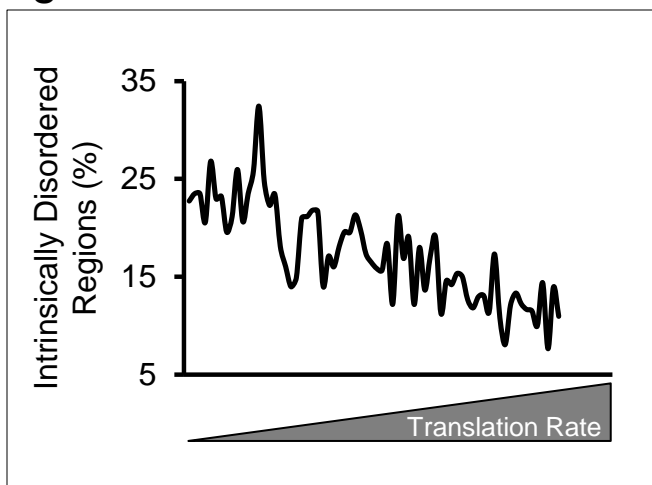

## Extended Data Fig. 10

|                    |                     |                    |                    |                    |
|--------------------|---------------------|--------------------|--------------------|--------------------|
| MNPSAPSYPM         | ASLYVGD LHP         | DVTEAMLYEK         | FSPAGPILSI         | RVCRDMITRR         |
| <u>SLGYAYVNFQ</u>  | <u>QPADAERALD</u>   | <u>TMNFDVIK</u> GK | PVRIMWSQRD         | PSLRKSGVGN         |
| IFIKNLDKSI         | DNK <u>ALYDTFS</u>  | <u>AFGNILSCKV</u>  | VCDENGSKGY         | GFVHFETQEA         |
| AERAIEKMNG         | MLLNDRKVFV          | GRFKSRKERE         | AELGAR <u>AKEF</u> | <u>TNVYIK</u> NFGE |
| DMDDERLKDL         | FGK <u>FGPALS</u> V | <u>KVMTDESGKS</u>  | <u>KGFGFVSFER</u>  | HEDAQKAVDE         |
| MNGKELNGKQ         | IYVGRAQKKV          | ERQTELKRKF         | EQMKQDRITR         | YQGVNLYVKN         |
| LDDGIDDERL         | <u>RKEFSPFGTI</u>   | <u>TSAKVMMEGG</u>  | RSKGFVFCF          | SSPEEATKAV         |
| TEMNGR <u>IVAT</u> | <u>KPLYVALAQR</u>   | KEER <u>QAHLTN</u> | <u>QYMQR</u> MASVR | AVPNPVINPY         |
| QPAPPSGYFM         | AAIPQTQNR           | AYYPPSQIAQ         | LRPSRWTAQ          | GARPHPFQNM         |
| PGAIRPAAPR         | PPFSTMRPAS          | SQVPRVMSTQ         | <u>RVANTSTQTM</u>  | <u>GPRPAAAAAA</u>  |
| <u>ATPAVR</u> TVPQ | YKYAAGVRNP          | QQHLNAQPQV         | TMQQPAVHVQ         | QQEPLTASML         |
| ASAPPQEQKQ         | MLGER <u>LFPLI</u>  | <u>QAMHPTLAGK</u>  | ITGMLLEIDN         | SELLHMLESP         |
| ESLR <u>SKVDEA</u> | <u>VAVLQAHQAK</u>   | EAAQKAVNSA         | TGVPTV             |                    |

## Extended Data Fig. 11

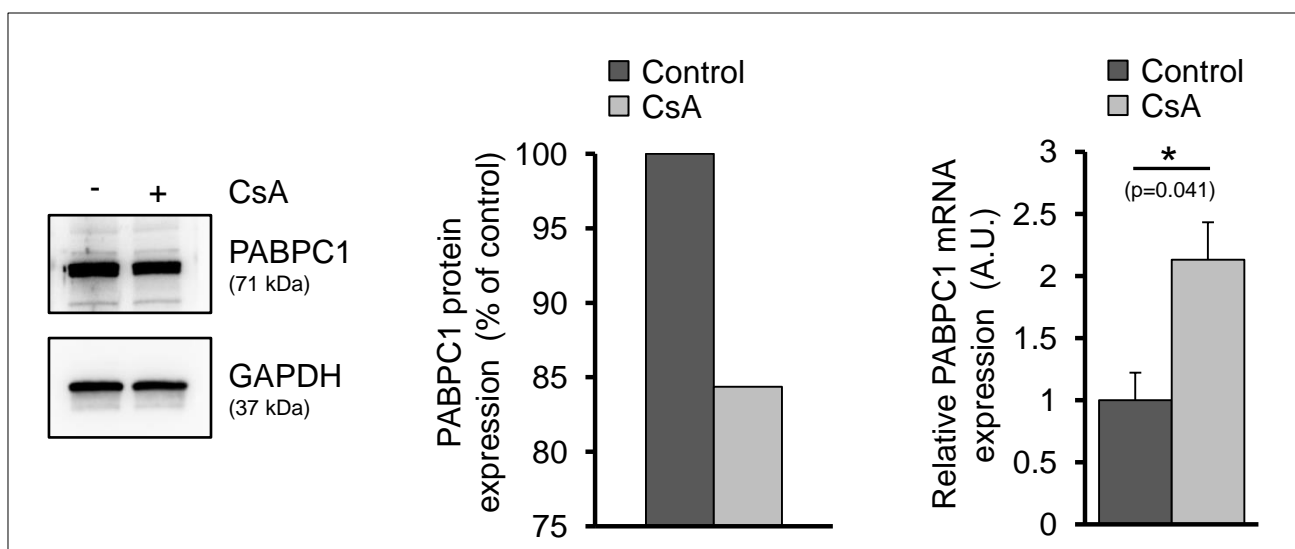

# Extended Data Figure Legends

## **Extended Data Fig.1: Identification coverage of PPIA.**

Spots were excised from 2-D SDS PAGE for extraction and trypsin digestion. MS/MS spectra cover 49.8% of the entire PPIA protein sequence (underlined).

## **Extended Data Fig.2: PPIA is the most highly transcribed chaperone gene in HSPCs.**

Violin plot represents the per gene distribution of RNAseq reads in the mouse HSPC transcriptome. PPIA is the 6<sup>th</sup> most highly expressed gene out of 15,778 genes. Red spot indicates PPIA transcript.

**Extended Data Fig.3: Phylogenetic tree of the Cyclophilin protein family in humans.** The tree was based on protein sequence alignments from the NCBI RefSeq database with the EMBL Clustal Omega program. The red box indicates PPIA.

## **Extended Data Fig.4: Limiting Dilution Transplantations of PPIA heterozygous (PPIA<sup>+/-</sup>) and knockout (PPIA<sup>-/-</sup>) bone marrow.**

500,000 competitor cells (CD45.1<sup>+</sup>) were co-injected with 4,000, 20,000, 100,000, or 500,000 nucleated bone marrow cells of PPIA<sup>+/-</sup> or PPIA<sup>-/-</sup> mice. Reconstitution of peripheral CD45.2<sup>+</sup> cells was assayed 20 weeks after transplantation and differences were compared using a two-tailed Poisson t-test. No significant difference exists between PPIA heterozygous and deficient donors.

## **Extended Data Fig. 5: Expression pattern of wild-type (WT) and mutant PPIA proteins.**

293T cells were transiently transfected with WT PPIA-GFP, PPIA(G104A)-GFP mutant or PPIA(H92Y)-GFP catalytic core mutant. The expression pattern of the WT and PPIA mutant proteins was assessed with an EVOS cell imaging system, using a GFP filter. Scale bar=50  $\mu$ m.

## **Extended Data Fig. 6: Interaction between PPIA and PABPC1 in haematopoietic cells.**

Co-IP followed by MS/MS identifies PABPC1 as an interactor of PPIA in the human haematopoietic cell lines THP1 (acute monocytic leukemia, AML) and NB4 (acute promyelocytic leukemia, APL). Cells were transduced with 3XF-tagged PPIA (3XF-WT-PPIA or 3XF-Mutant(G104A)-PPIA, respectively) and IP was performed with an anti-3XFLAG antibody. The arrow indicates the band for PABPC1 protein.

## **Extended Data Fig. 7: Efficiency of PPIA knockdown in 293T cells and HeLa cells.**

Cells were stably transduced with pLKO.1-TRC control, TRC PPIA Kd1, or TRC PPIA Kd2 lentiviral vectors, respectively. Then, cell lysates were prepared and loaded onto a SDS-PAGE in order to measure PPIA protein expression by Western-blot using a rabbit polyclonal anti-PPIA antibody. Glyceraldehyde 3-phosphate dehydrogenase (GAPDH) was used as a loading control for protein normalization.

## **Extended Data Fig. 8: Schematic representation of the pulsed SILAC (stable-isotope labelling in cell culture) experimental design used to evaluate protein *de novo* synthesis in this study.**

Following five days of growth in standard DMEM medium (containing light/unlabeled variants of lysine and arginine), heavy lysine and arginine (<sup>13</sup>C-<sup>15</sup>N-Lys and <sup>13</sup>C-<sup>15</sup>N-Arg) were added in excess to control or PPIA knock-down (Kd) HeLa or 293T cells. After medium exchange, newly synthesized proteins incorporate the heavy label while pre-existing proteins remain unlabeled. 24 h later, cells were harvested and protein lysates were digested. Pulse treatment for 24h allowed for metabolic labeling of newly translated proteins. The resulting peptides from each cell type and condition were submitted separately to liquid chromatography-tandem mass spectrometry (LC-MS/MS) analysis. Protein *de novo* synthesis was determined by the heavy to unlabeled ratio quantified by mass spectrometry, as previously described<sup>27,58</sup>.

## **Extended Data Fig. 9: Presence of intrinsically disordered regions correlates with a slower translation rate.**

Data analysis showing the inverse correlation between protein translation speed<sup>27</sup> and percentage of intrinsically disordered regions<sup>28</sup> in the whole proteome. Proteins with more intrinsically disordered regions translate at a slower rate than structured proteins.

## **Extended Data Fig. 10: Identification coverage of PABPC1.**

Co-immunoprecipitated bands were excised after SDS-PAGE (Fig. 2A), trypsin digested, and identified by MS/MS. Coverage for PABPC1 extends to 26.4% of the protein, including the N-terminal RNA-binding domain, the C-terminal cap-binding domain, and the unstructured linker region.

## **Extended Data Fig. 11: PABPC1 protein, but not transcript levels, are slightly decreased upon PPIA inhibition by cyclosporine A in MM.1S cells.**

Cyclosporine A (CsA, 10  $\mu$ M, Millipore Sigma) treatment was performed for 48 hours with DMSO as solvent control. Multiple myeloma cells were chosen for their high level of protein synthesis due to production of monoclonal immunoglobulins. Western blot image is representative of two independent biological replicates. RT-qPCR data are mean  $\pm$  SD of two independent experiments performed with triplicate samples; \*p < 0.05 by unpaired Student's two-tailed t-test. A.U., Arbitrary Unit.

## Extended Data Table 1

| Nucleotide-binding proteins |        |         |       |                             |      |                      |
|-----------------------------|--------|---------|-------|-----------------------------|------|----------------------|
| ACTL6A                      | MTA1   | SSRP1   | XRCC5 | DDX1                        | SFPQ | C14orf166            |
| CDC5L                       | PARP1  | SUB1    |       | DDX17                       | YBX1 | EEF1A1               |
| CREB1                       | PML    | SUPT16H |       | DDX21                       |      | hnRNPUL1             |
| CTBP1                       | PNN    | TADA2B  |       | DDX5                        |      | ILF3                 |
| CTBP2                       | RBBP4  | TFAM    |       | G3BP1                       |      | KHSRP                |
| FOXC1                       | RBBP5  | TFCP2   |       | hnRNPD                      |      | RBMX                 |
| GTF2I                       | RBBP7  | TP53    |       | hnRNPK                      |      |                      |
| HDAC1                       | RUVBL1 | TRIM28  |       | ILF2                        |      |                      |
| HDAC2                       | RUVBL2 | UBP1    |       | NACA                        |      |                      |
| HIC2                        | SND1   | UBTF    |       | NONO                        |      |                      |
| DNA-binding proteins        |        |         |       | DNA- & RNA-binding proteins |      | RNA-binding proteins |

## Extended Data Table 2

| PPIA target proteins involved in phase separation |         |         |         |                |        |         |       |                                        |        |
|---------------------------------------------------|---------|---------|---------|----------------|--------|---------|-------|----------------------------------------|--------|
| ANXA7                                             | FXR1    | IGF2BP3 | SNRPF   | CD2BP2         | PARP1  | SF3B1   | SNU13 | ACTB                                   | RPS4X  |
| C14orf166                                         | FXR2    | KHSRP   | SRSF9   | CPSF6          | PML    | SF3B3   | SRRM2 | DHX9                                   | RPS6   |
| CAPRIN1                                           | G3BP1   | KPNA3   | STAU1   | CREB1          | PRPF3  | SFPQ    | THOC6 | hnRNPL                                 | TARDP  |
| DDX1                                              | hnRNPA1 | LIG3    | STRAP   | DDX21          | PRPF6  | SNRP200 | TOP1  | hnRNPU                                 | TUBA1A |
| DDX6                                              | hnRNPA3 | PABPC1  | SYNCRIP | DDX23          | PRPF8  | SNRP40  | TOP2A | HSPA1A                                 | TUBB   |
| DHX30                                             | hnRNPD  | PABPC4  | USP10   | DDX39B         | RBBP4  | SNRPB   | TP53  | HSPA1B                                 |        |
| DSP                                               | hnRNPF  | PTBP1   | YBX1    | LUC7L2         | RBMX   | SNRPD1  | UBTF  | INA                                    |        |
| EIF3E                                             | hnRNPH3 | PYCR1   |         | NCBP1          | RUVBL2 | SNRPD2  |       | NCL                                    |        |
| EIF4A1                                            | hnRNPR  | RBM4    |         | NONO           | SART1  | SNRPD3  |       | RPL6                                   |        |
| FMR1                                              | IGF2BP1 | RTCB    |         | NPM1           | SF3A1  | SNRPE   |       | RPLP0                                  |        |
| Cytoplasmic stress granules                       |         |         |         | Nuclear bodies |        |         |       | Cytoplasmic ribonucleoprotein granules |        |



# Extended Data Table Legends

**Extended Data Table 1: List of PPIA client proteins which are nucleotide-binding proteins.**

Proteins are listed by their official gene name.

**Extended Data Table 2: List of PPIA client proteins which are involved in protein phase separation.**

Proteins are listed by their official gene name. Nuclear bodies include nucleoli, Cajal bodies, nuclear speckles, paraspeckles, PML nuclear bodies, and histone locus bodies.
